# Supplementary material for: Chemo-mechanical limitations of liquid alloy anodes for sodium solid-state batteries
Source: Royal Society of Chemistry journal article supplement (doi:10.1039/d5eb00097a), 2025-01-01
Supplement: d5eb00097a1.pdf [file d5eb00097a1.pdf]

# Chemo-Mechanical limitations of liquid alloy anodes for sodium solid-state batteries

Daren Wu<sup>†</sup> and Kelsey B. Hatzell<sup>\*,†,‡,¶</sup>

<sup>†</sup>*Andlinger Center for Energy and the Environment, Princeton University, Princeton, NJ  
08540, USA*

<sup>‡</sup>*Department of Mechanical and Aerospace Engineering, Princeton University, Princeton,  
NJ 08540, USA*

<sup>¶</sup>*Department of Chemical and Biological Engineering, Princeton University, Princeton,  
NJ 08540, USA*

E-mail: kelsey.hatzell@princeton.edu

## Supplemental figures

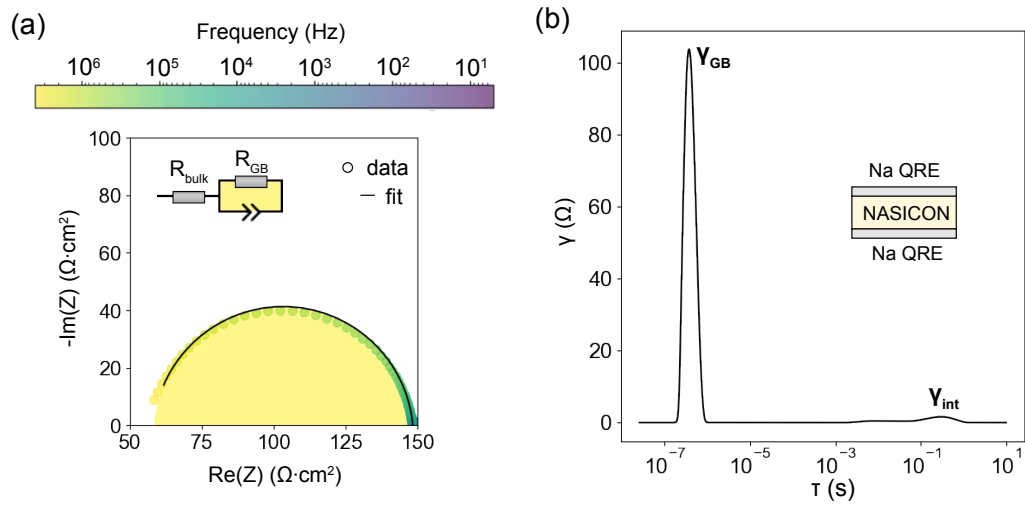

**Figure S1** (a) Fitted EIS data collected on Na QRE/NASICON/Na QRE cell and (b) corresponding DRT spectra showing negligible interfacial resistance.

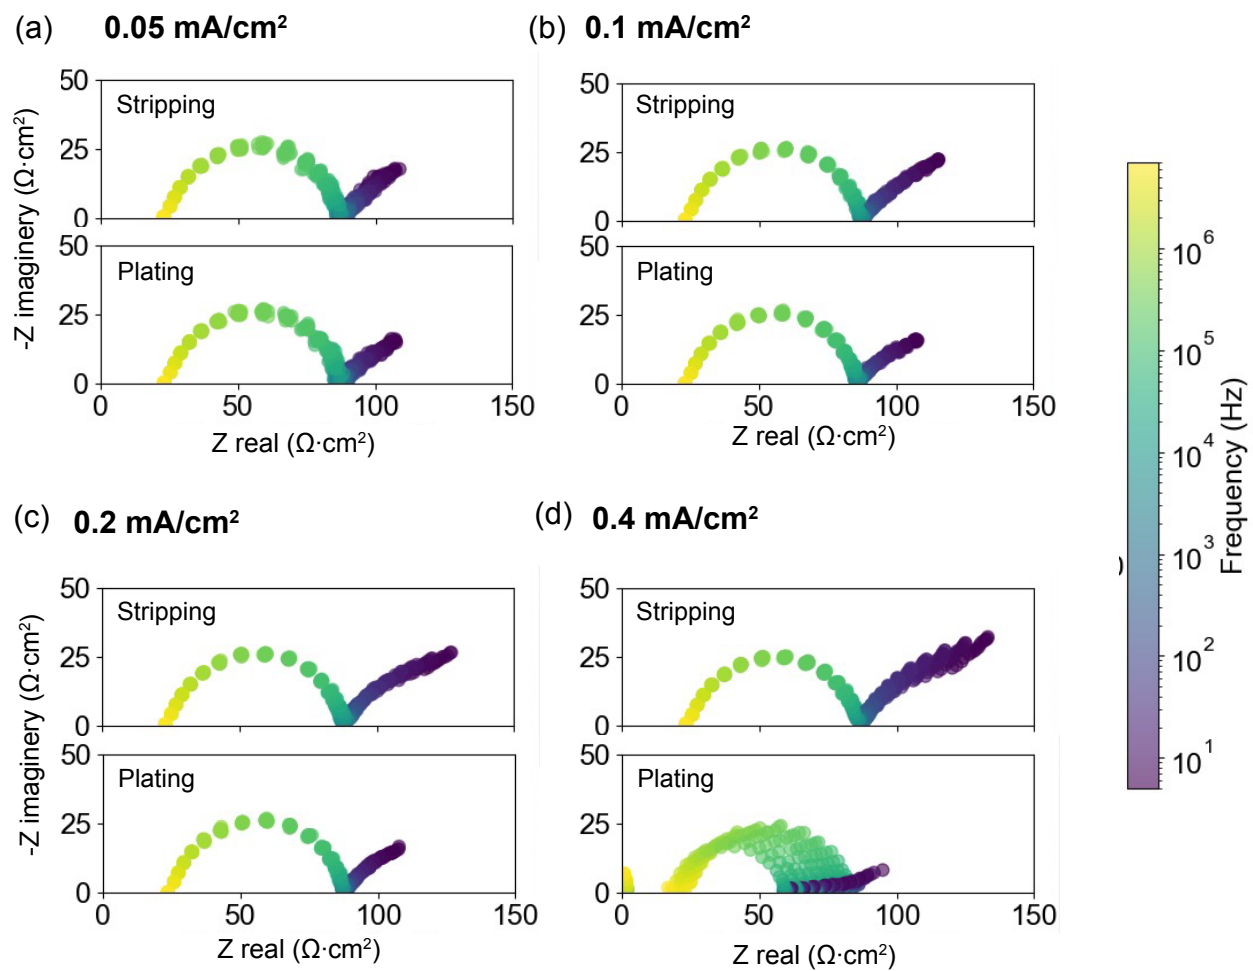

**Figure S2** The *operando* GEIS spectra collected during the CCD test of NaK50 liquid electrode under different current densities.

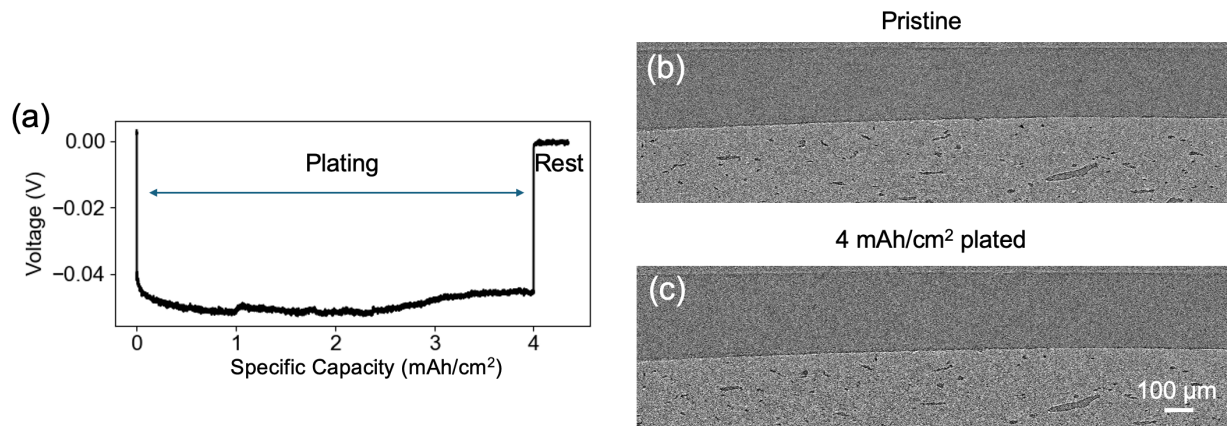

**Figure S3** *in situ* XCT collected over Na plating process of NaK liquid anode under 0.4 mA/cm<sup>2</sup> current density. (a) Voltage profile of the *in situ* XCT cell. (b-c) Reconstructed virtual cross-sections at the NaK/NASICON interface showing homogenous plating without crack formation.

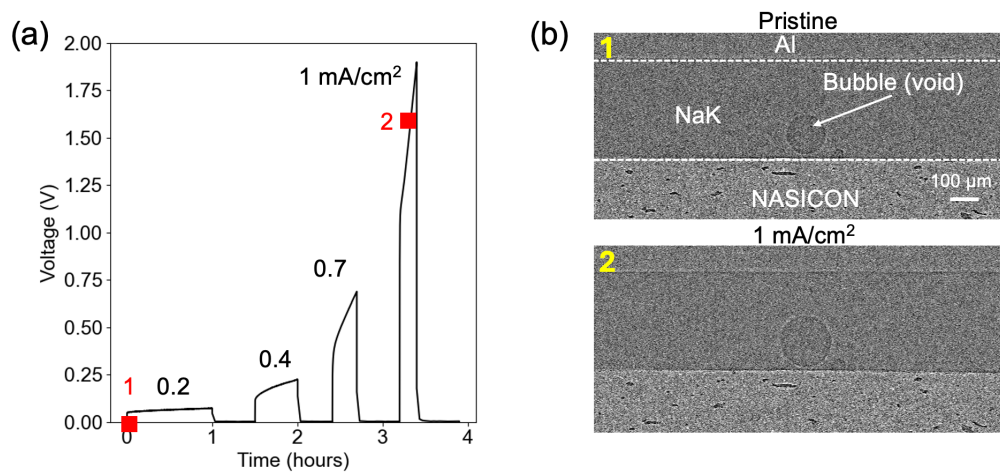

**Figure S4** *in situ* XCT collected over staircase Na stripping process of NaK liquid electrode under 0.2, 0.4, 0.7 and 1.0 mA/cm<sup>2</sup> current densities. (a) Voltage profile of the *in situ* XCT cell. (b) Reconstructed virtual cross-sections at the NaK/NASICON interface.

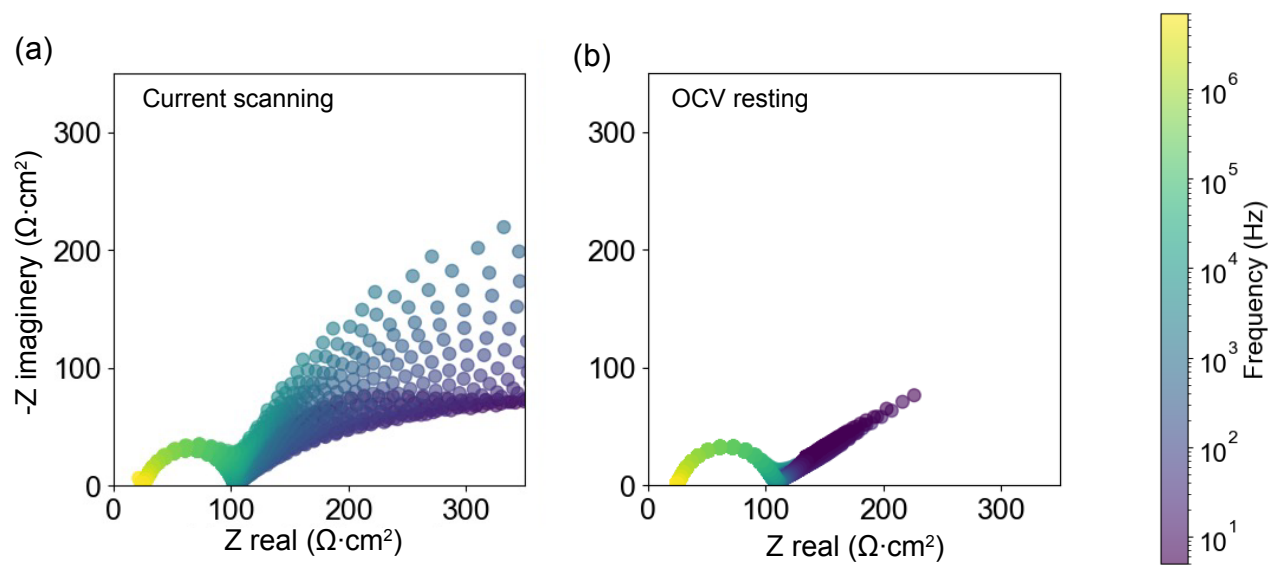

**Figure S5** The *operando* GEIS spectra collected during Na stripping current scanning (a) and PEIS spectra collected during subsequent OCV resting (b) of NaK50 liquid electrode.

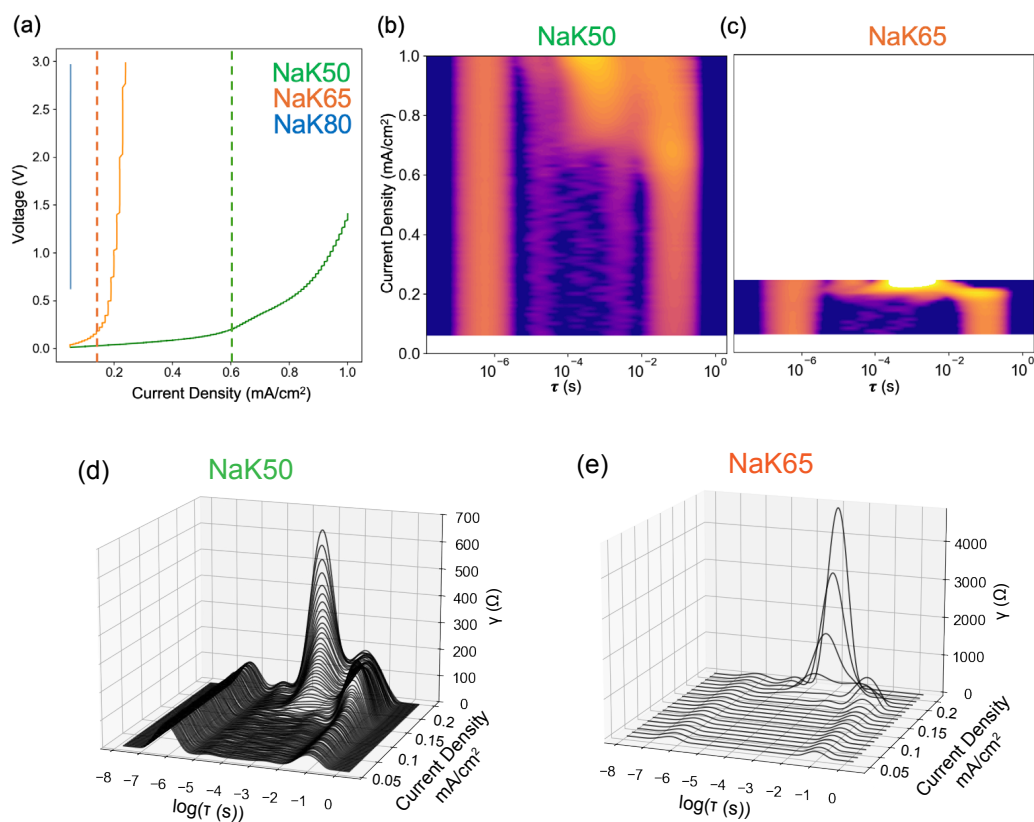

**Figure S6** (a) Voltage profiles of current scanning experiment performed in NaK liquid alloys at different Na concentrations. *Operando* DRT spectra as function of Na stripping current density collected on (b,d) NaK50 and (c,e) NaK65 working electrodes.

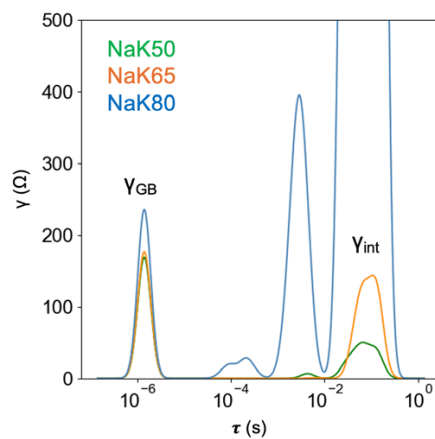

**Figure S7** DRT spectra collected on pristine NaK/NASICON/Na cells with NaK50, NaK65 and NaK80 working electrodes.

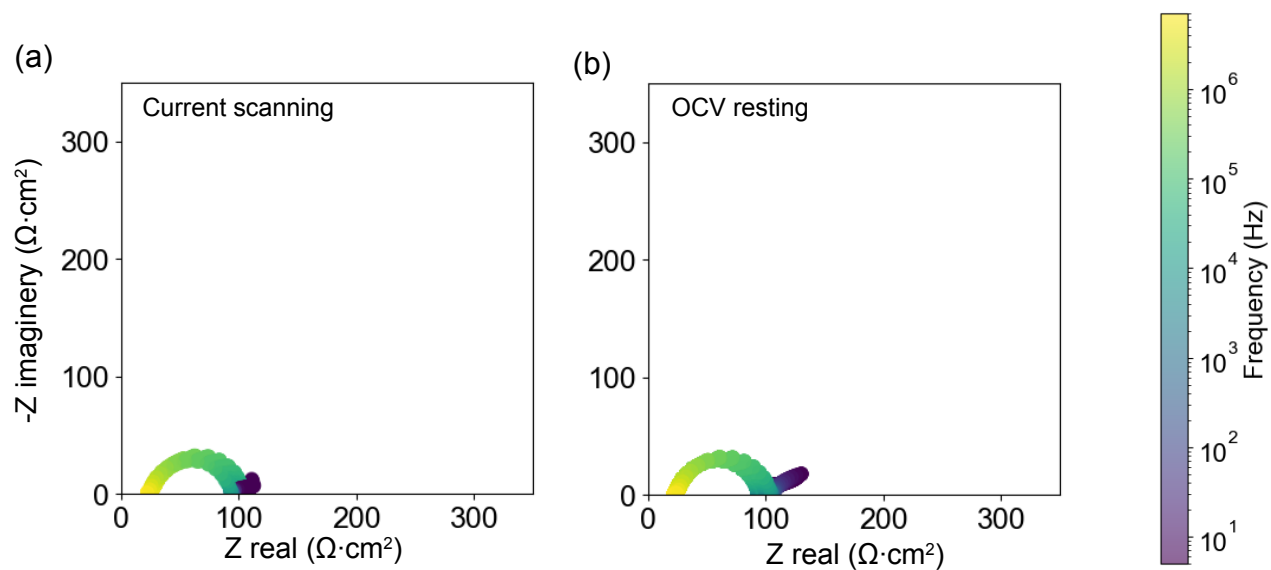

**Figure S8** The *operando* GEIS spectra collected during Na plating current scanning (a) and PEIS spectra collected during subsequent OCV resting (b) of NaK50 liquid electrode.

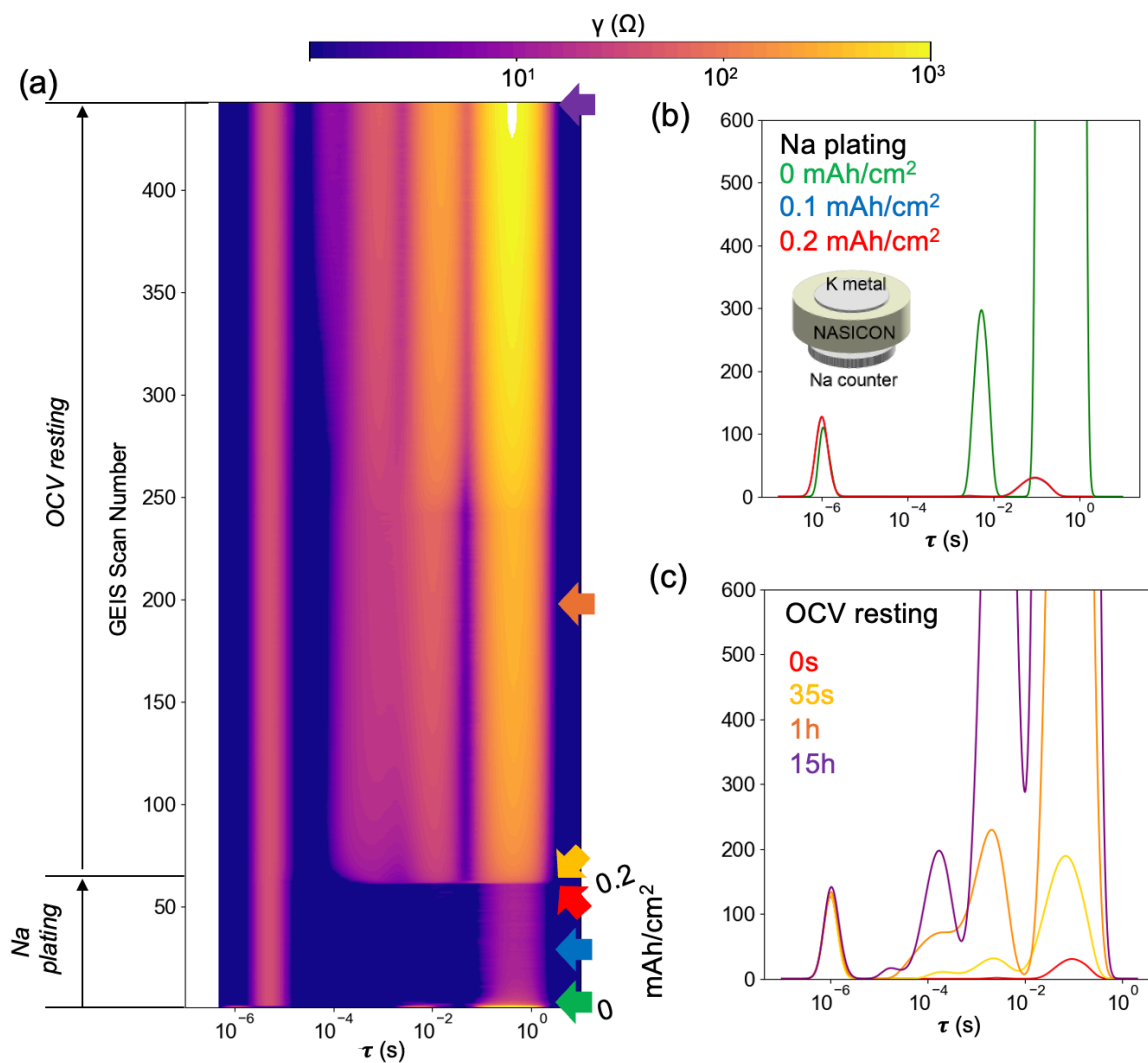

**Figure S9** (a) *Operando* DRT spectra obtained during Na plating-OCV resting test on K metal working electrode. (b) DRT spectra overlay over the Na plating process at different plated capacities. (c) DRT spectra overlay over the OCV resting process.
