# Supplementary figures and images for: Chemo-mechanical limitations of liquid alloy anodes for sodium solid-state batteries
Source: Royal Society of Chemistry journal article supplement (doi:10.1039/d5eb00097a), 2025-01-01

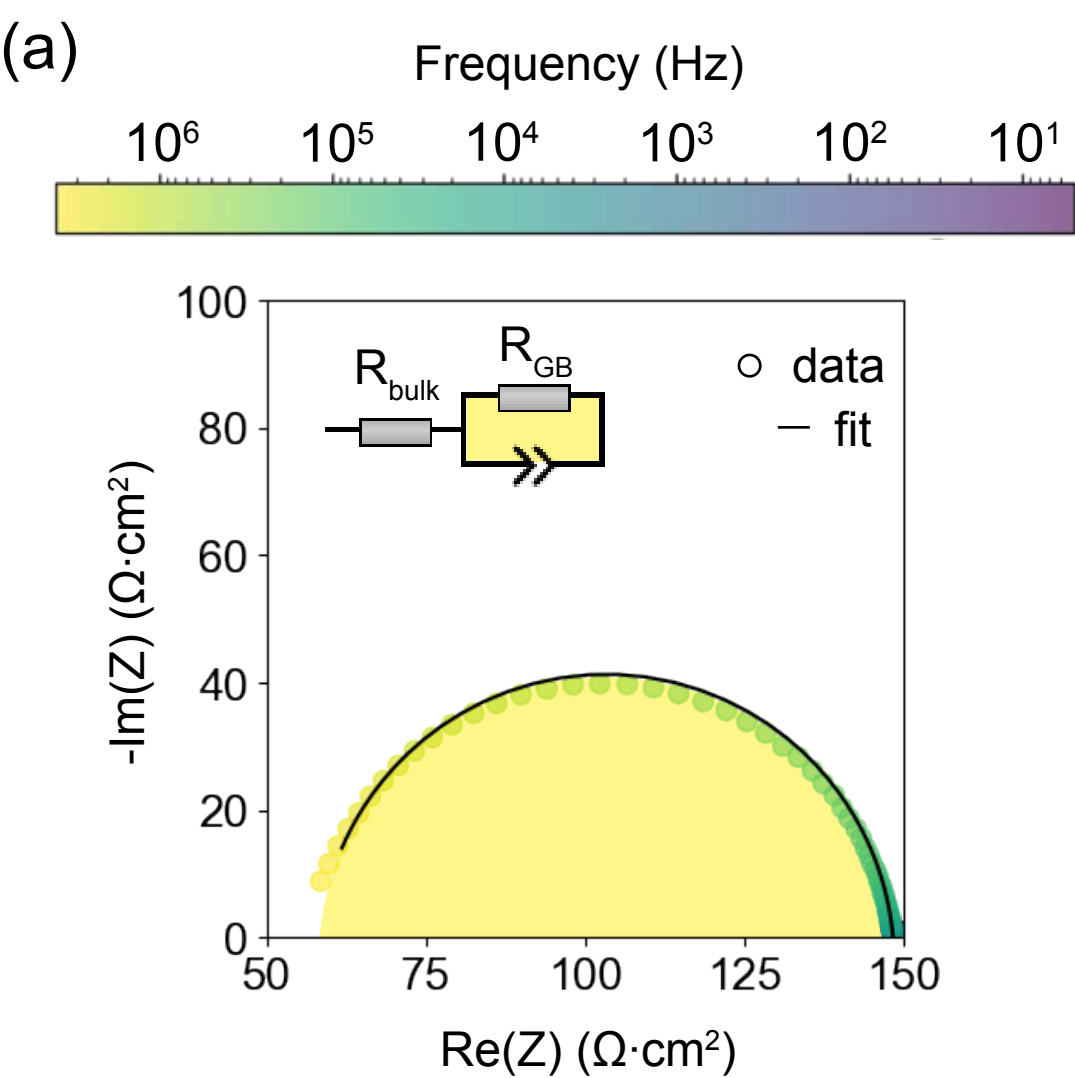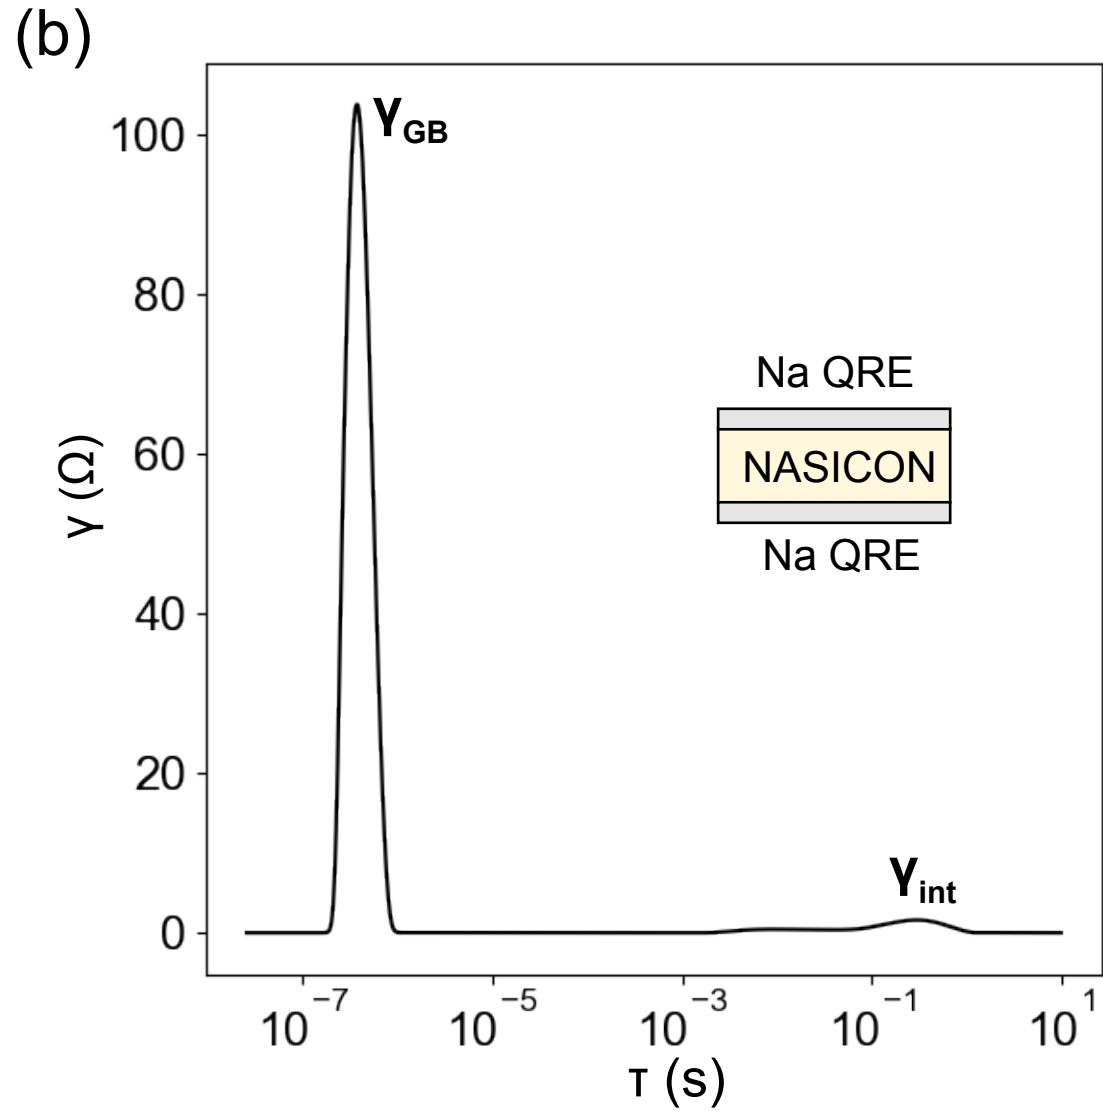

Supplement: d5eb00097a2.zip [file Figure S1.pdf › SI Figures/Figure S1.pdf]

(a) **0.05 mA/cm<sup>2</sup>**

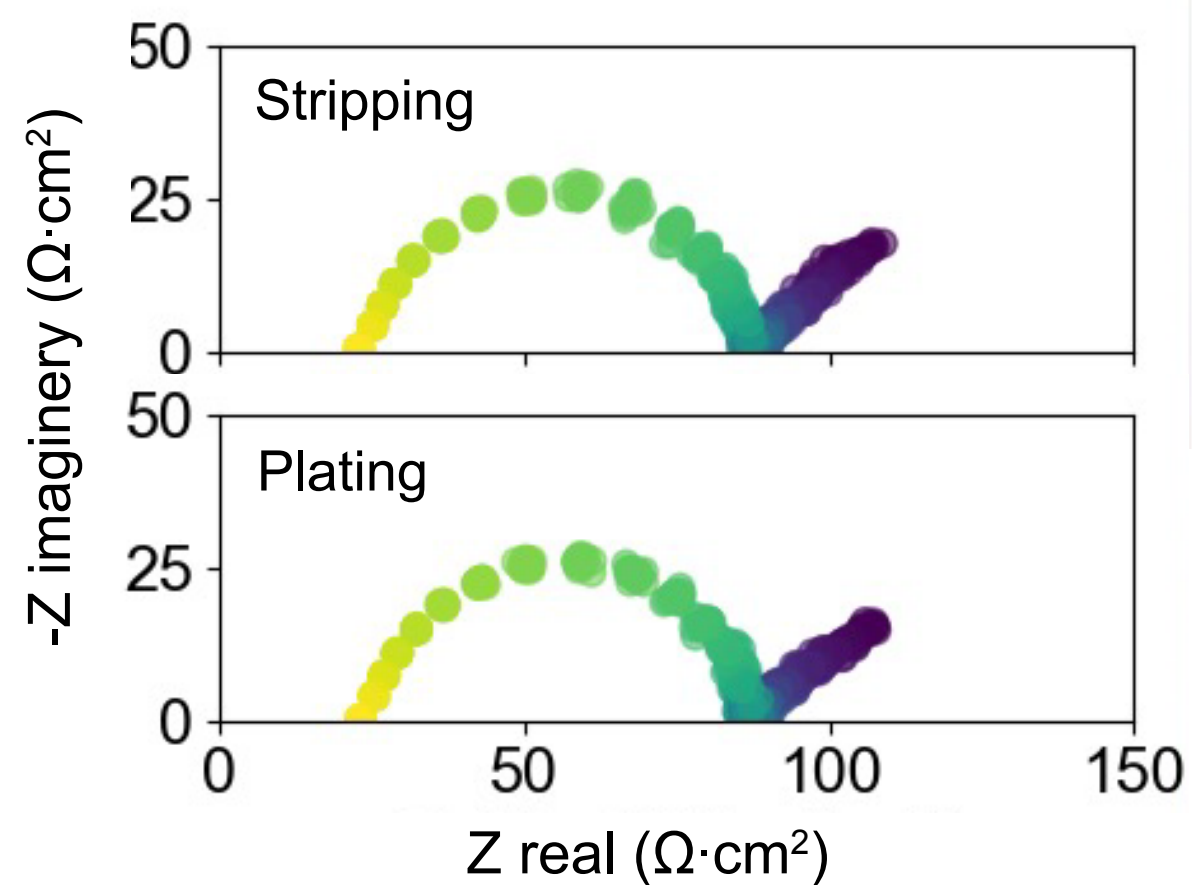

(b) **0.1 mA/cm<sup>2</sup>**

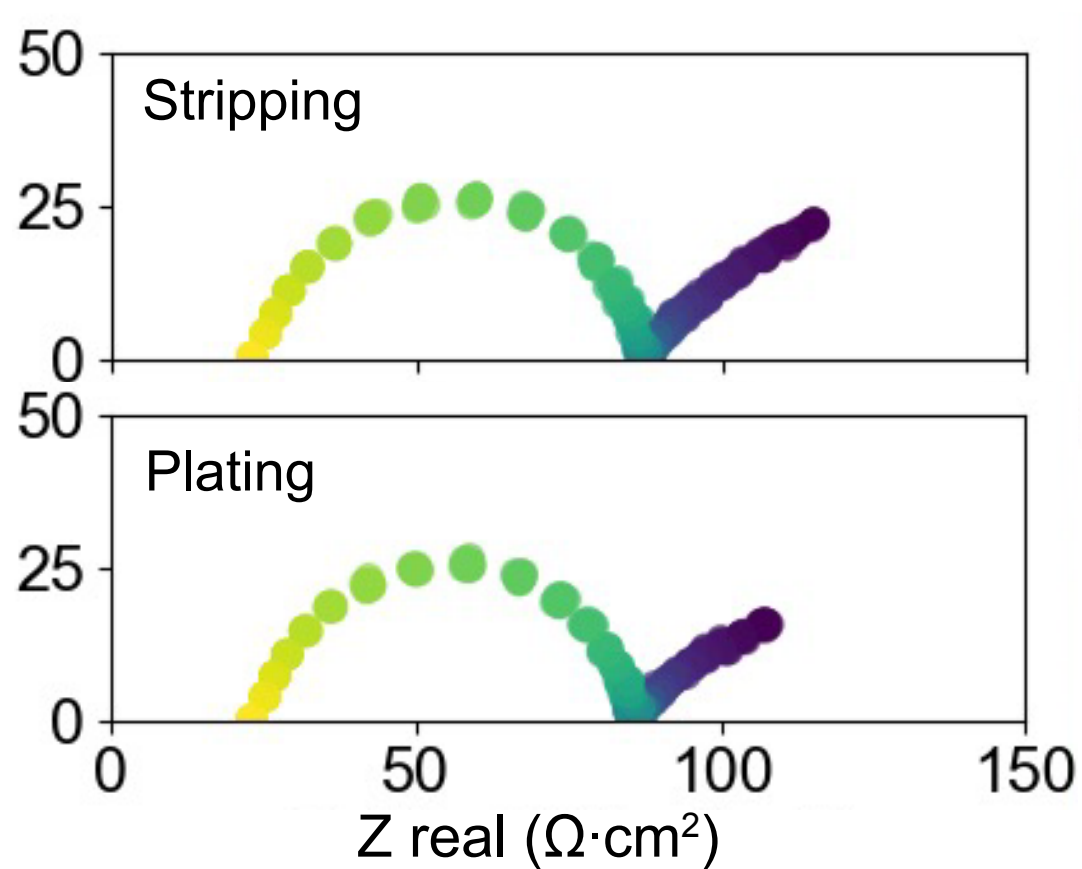

(c) **0.2 mA/cm<sup>2</sup>**

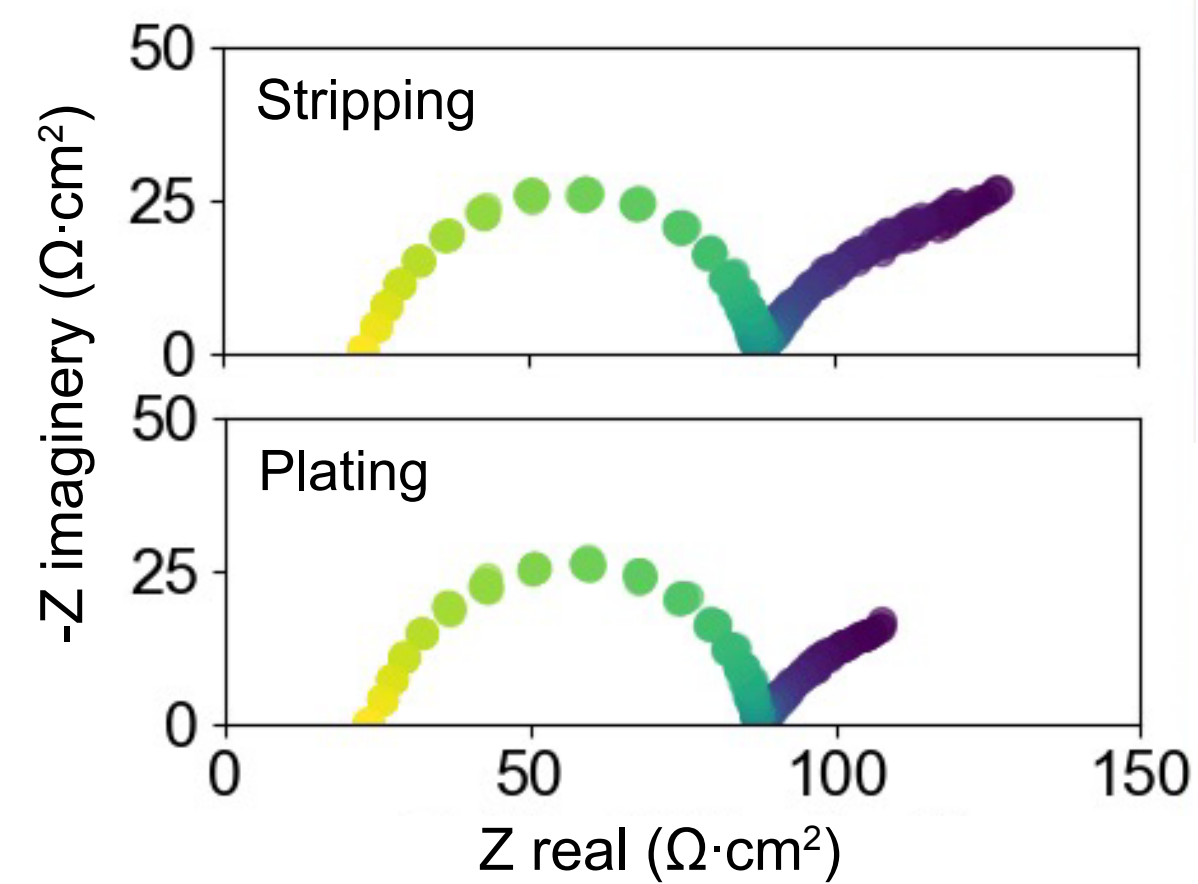

(d) **0.4 mA/cm<sup>2</sup>**

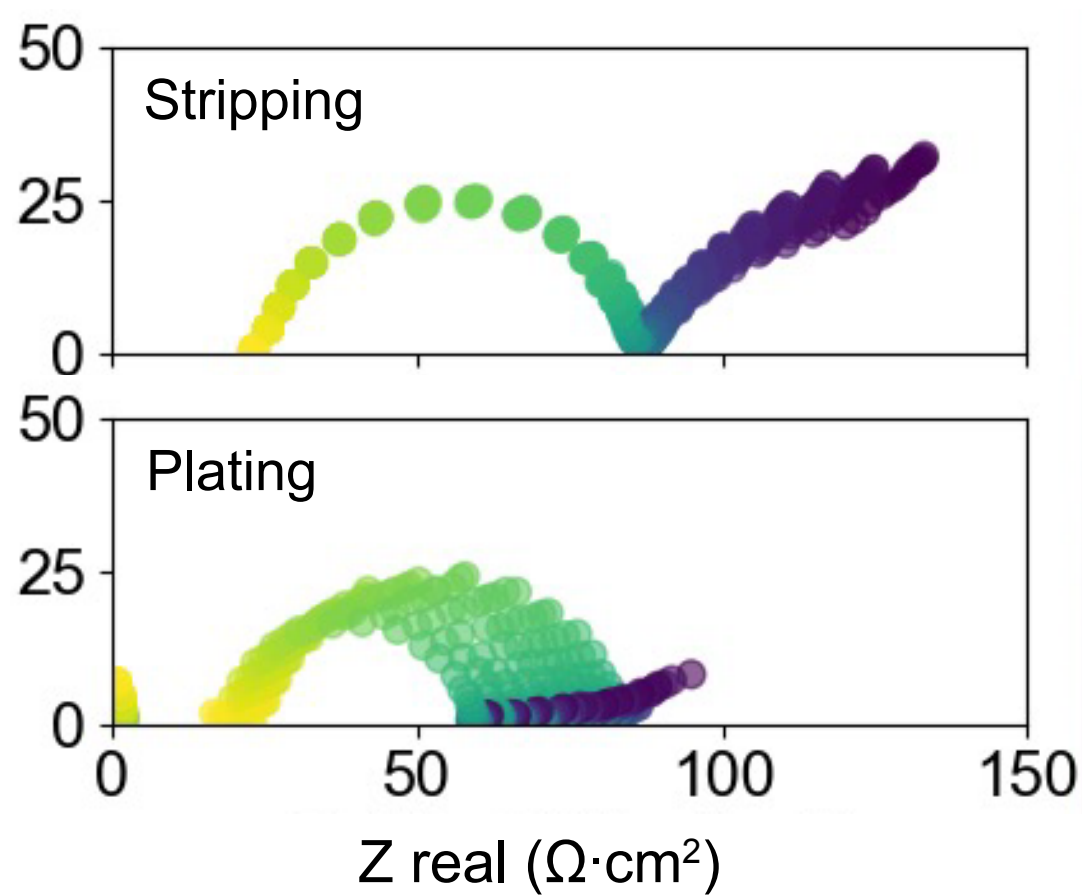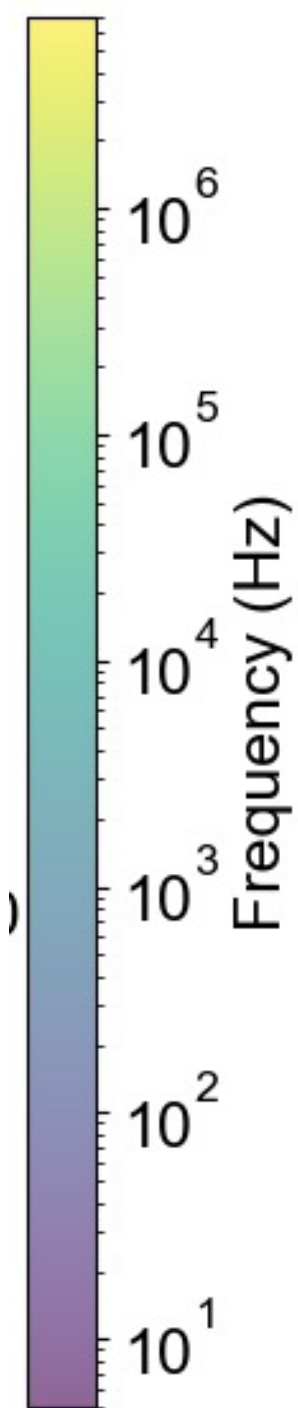

Supplement: d5eb00097a2.zip [file Figure S2.pdf › SI Figures/Figure S2.pdf]

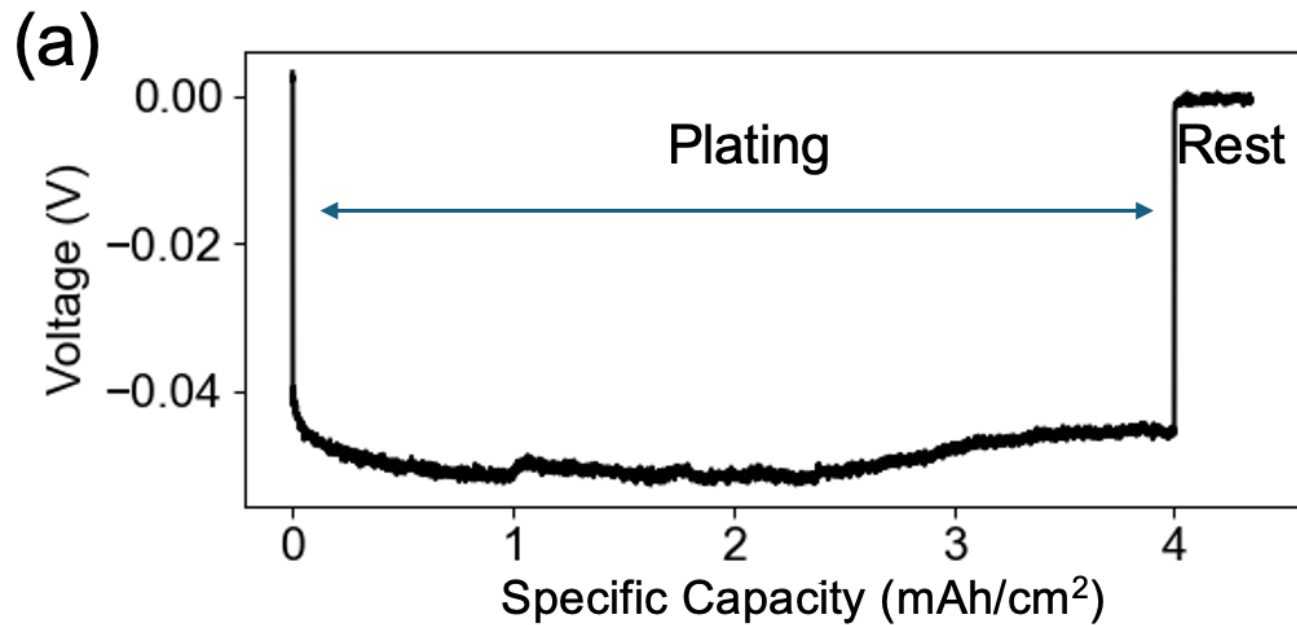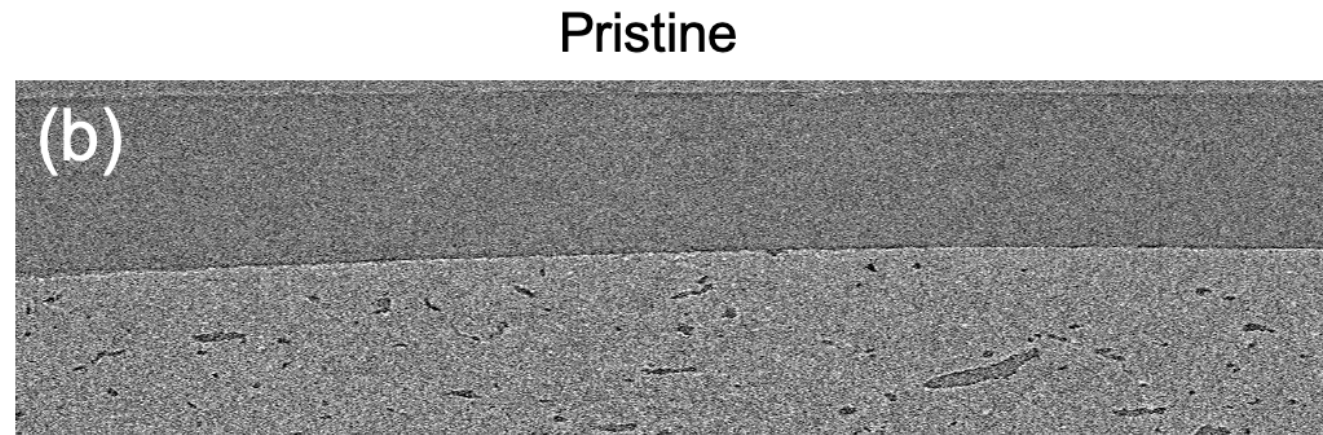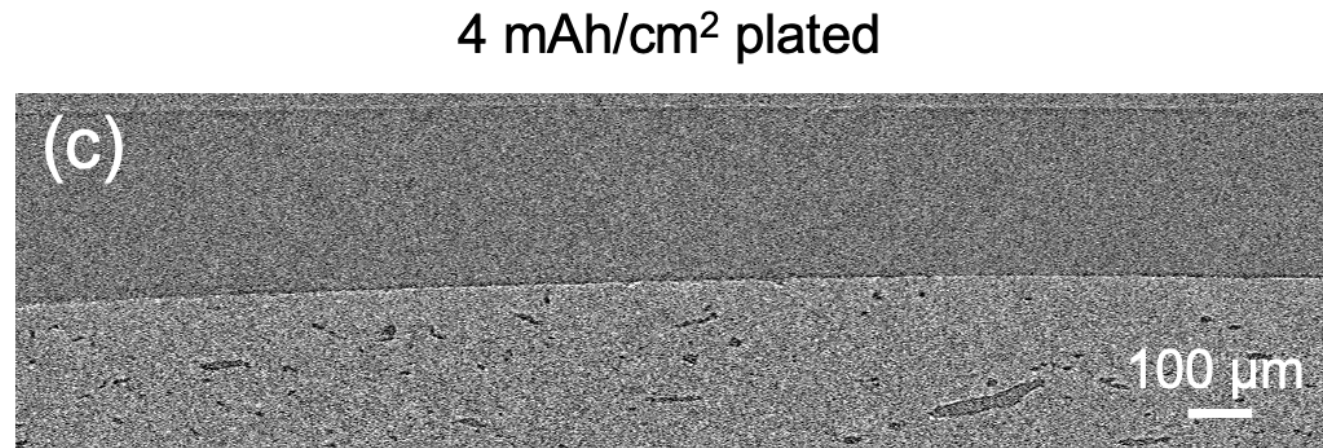

Supplement: d5eb00097a2.zip [file Figure S3.pdf › SI Figures/Figure S3.pdf]

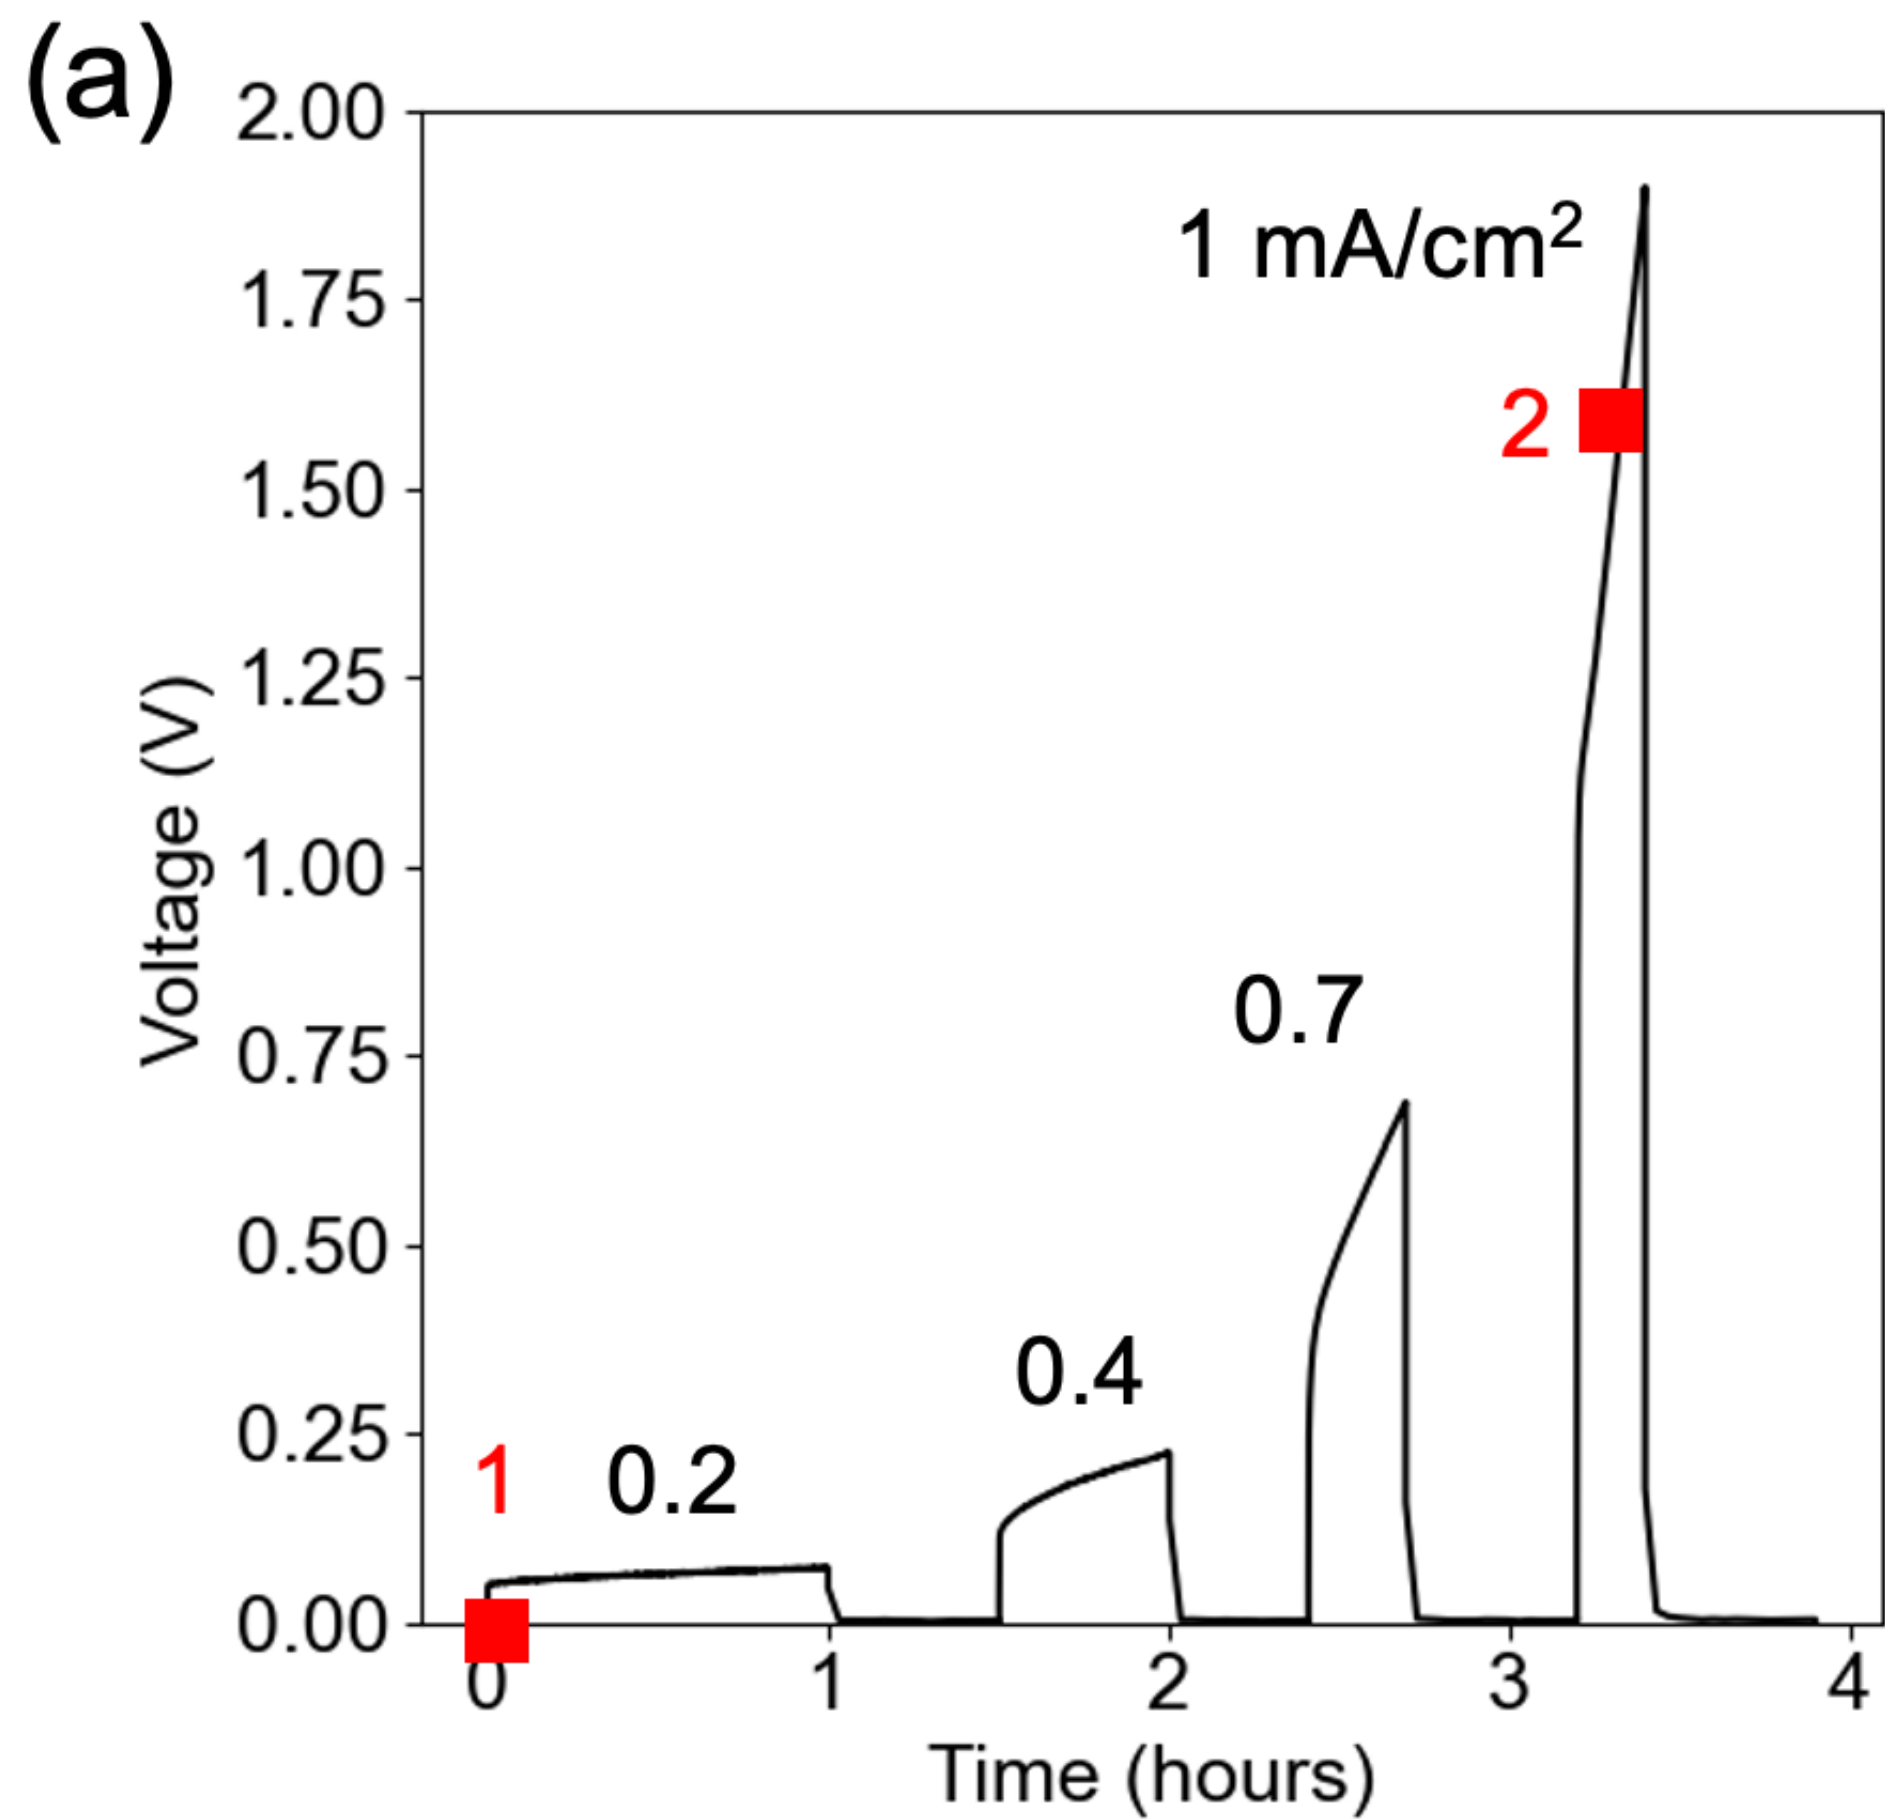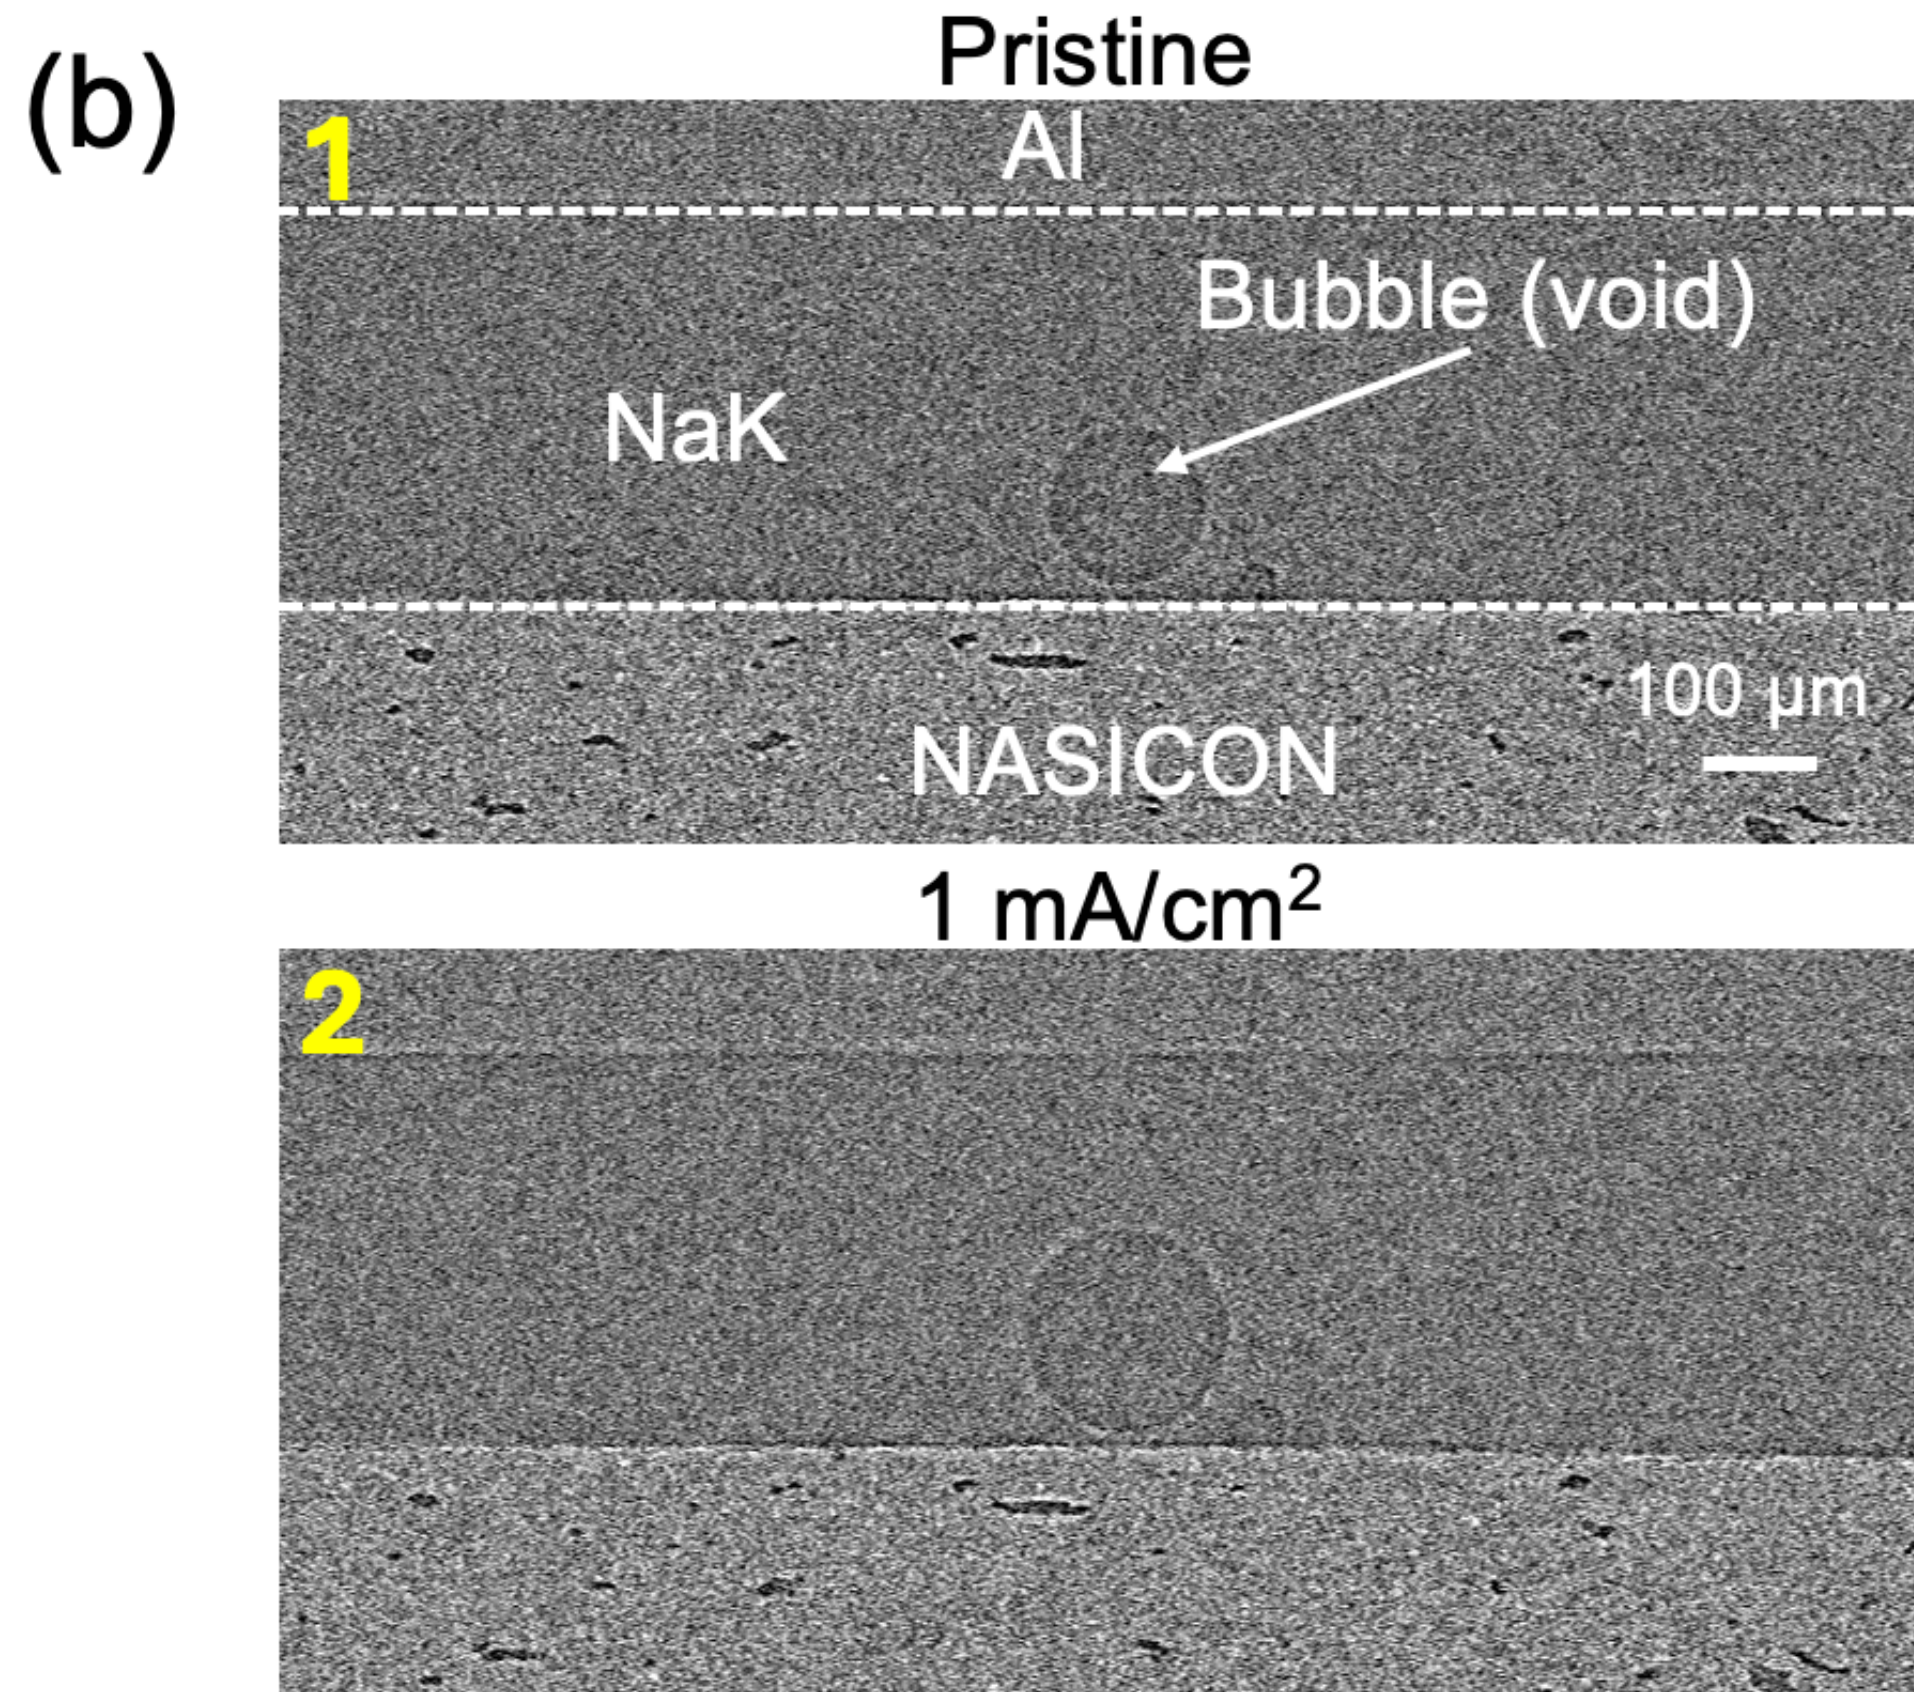

Supplement: d5eb00097a2.zip [file Figure S4.pdf › SI Figures/Figure S4.pdf]

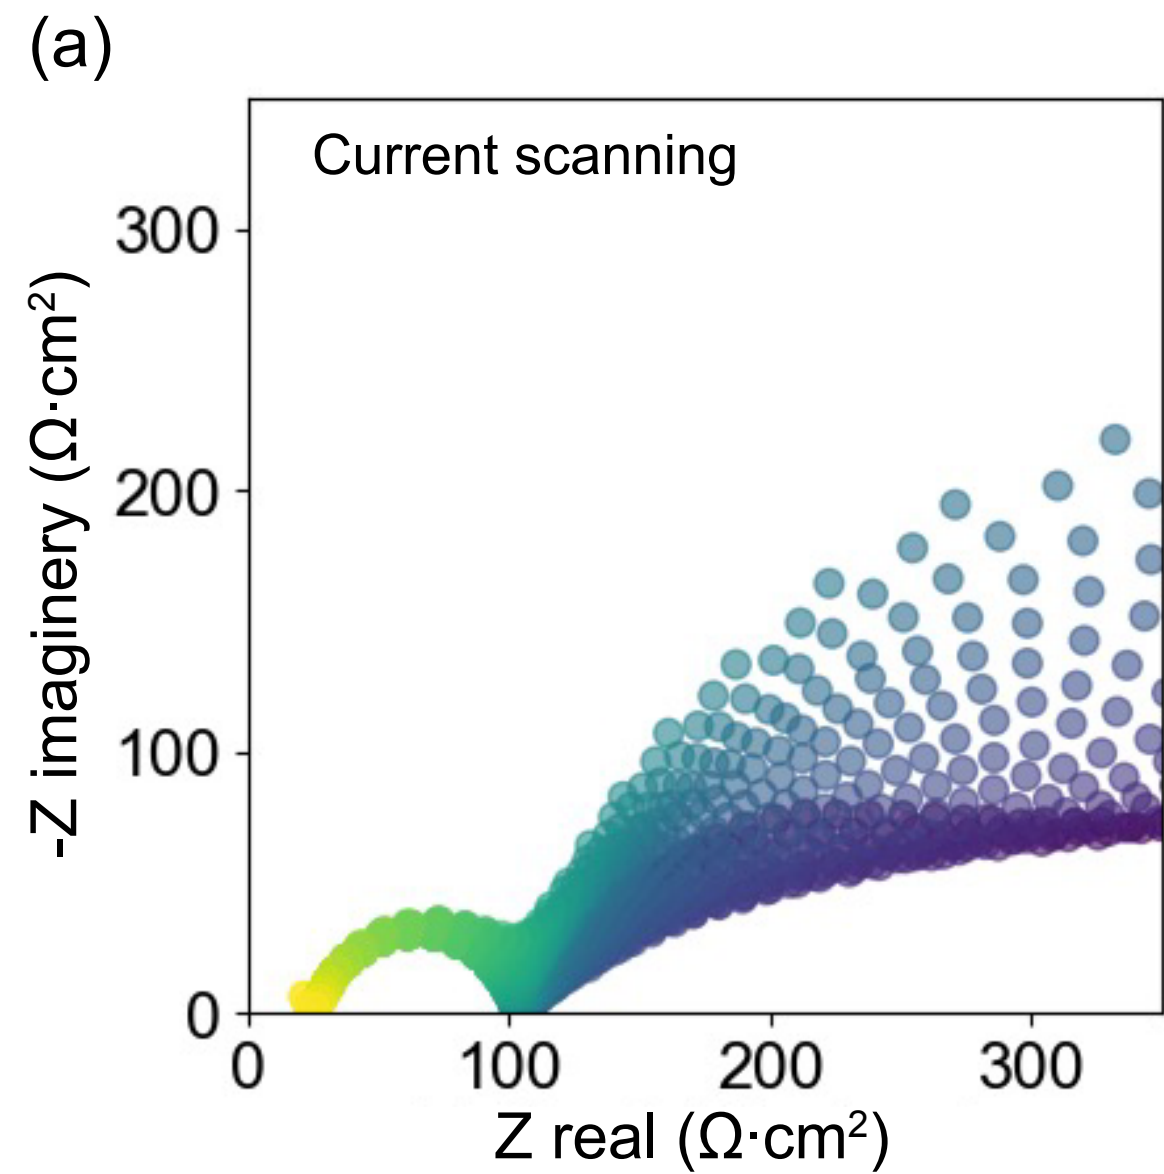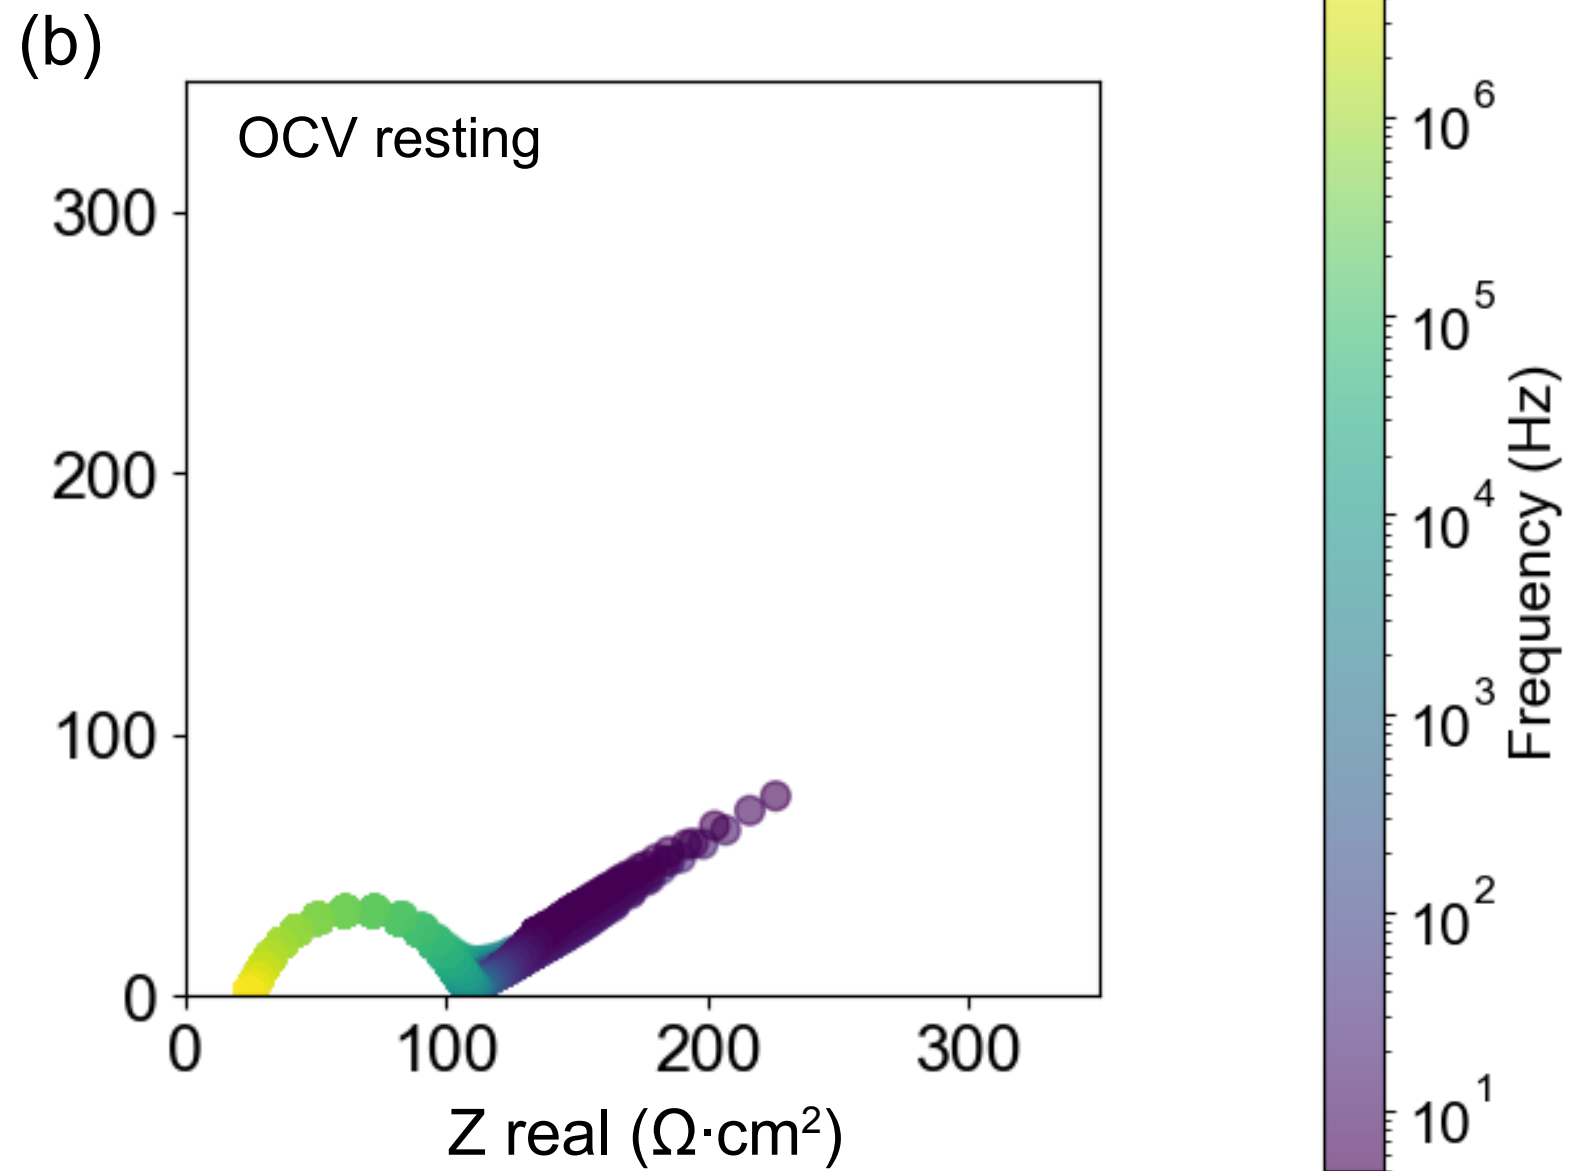

Supplement: d5eb00097a2.zip [file Figure S5.pdf › SI Figures/Figure S5.pdf]

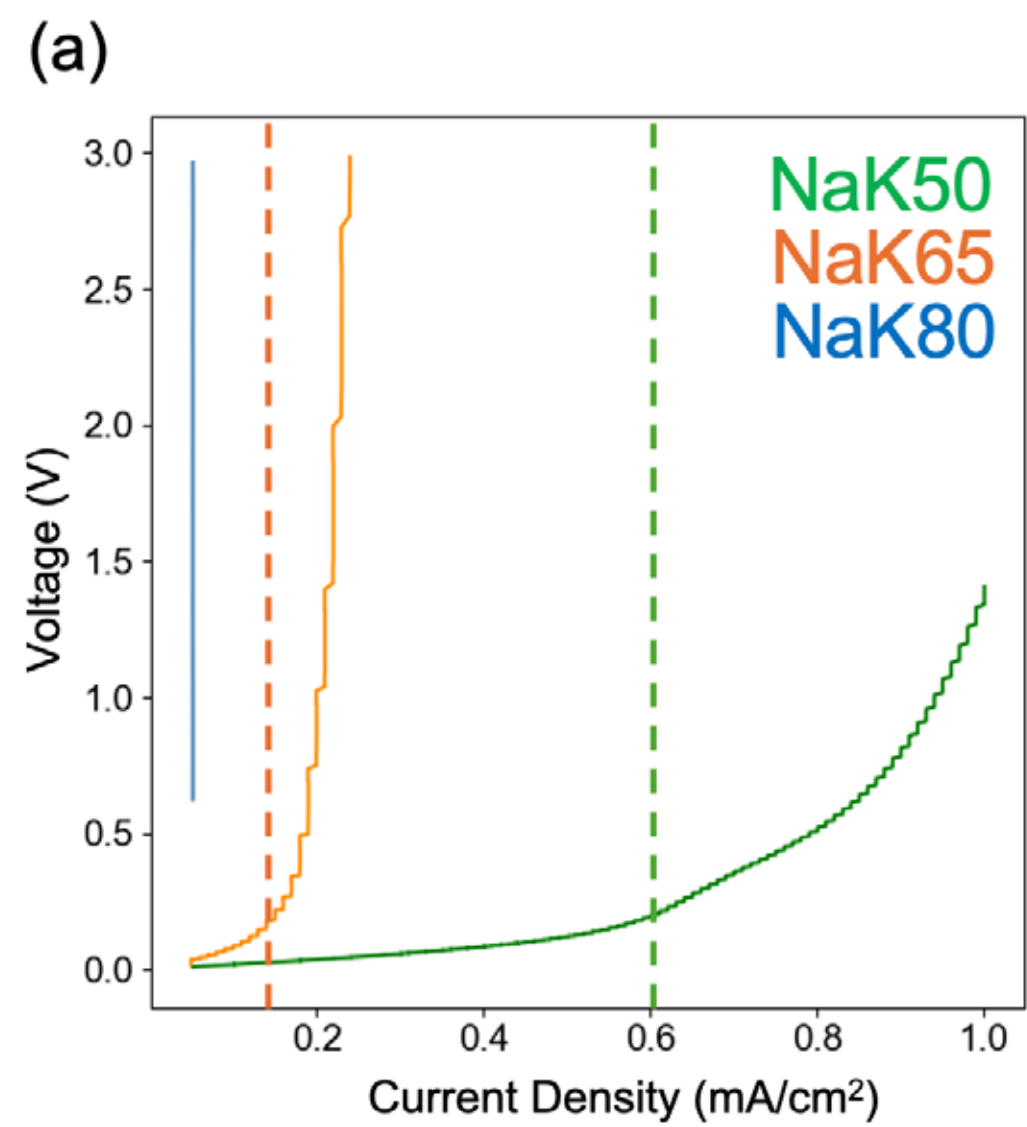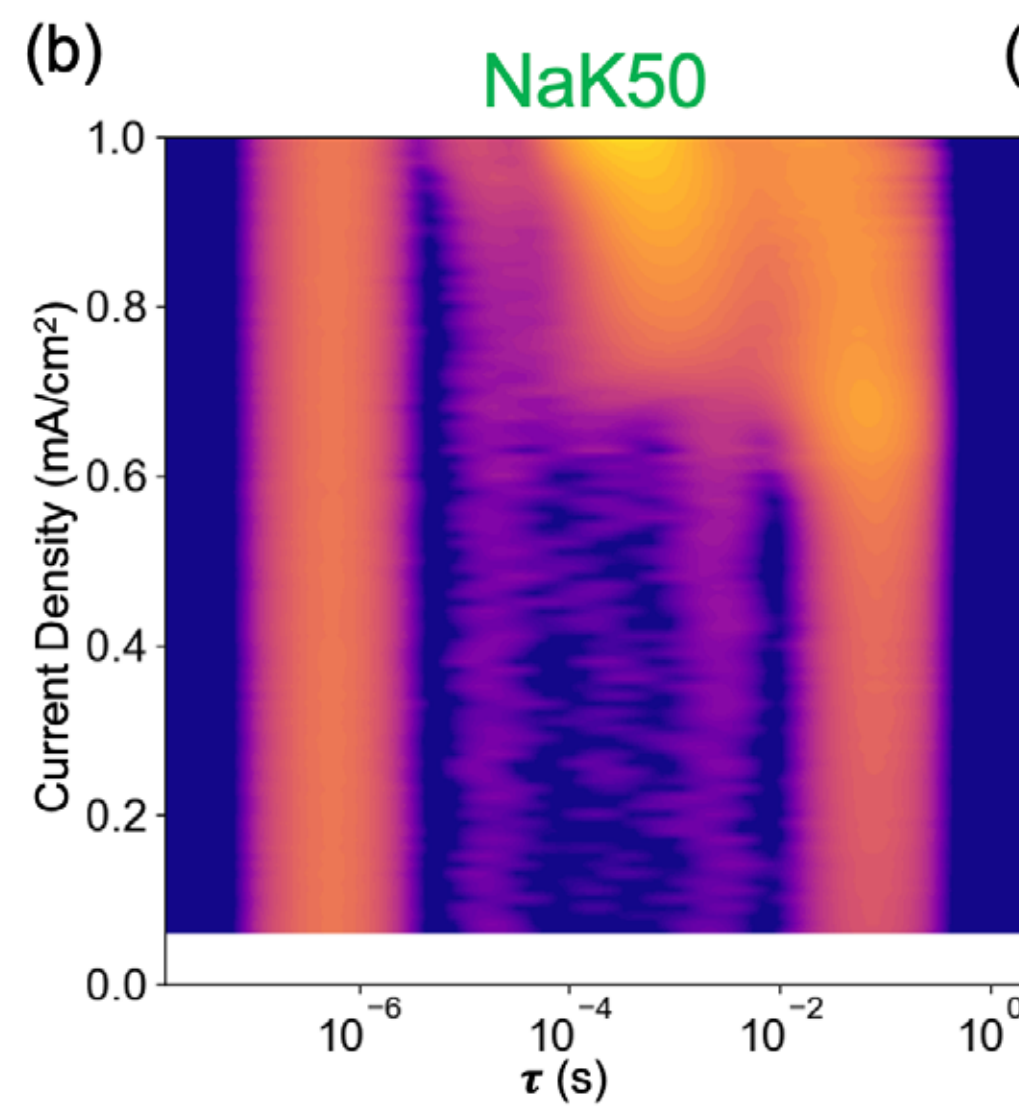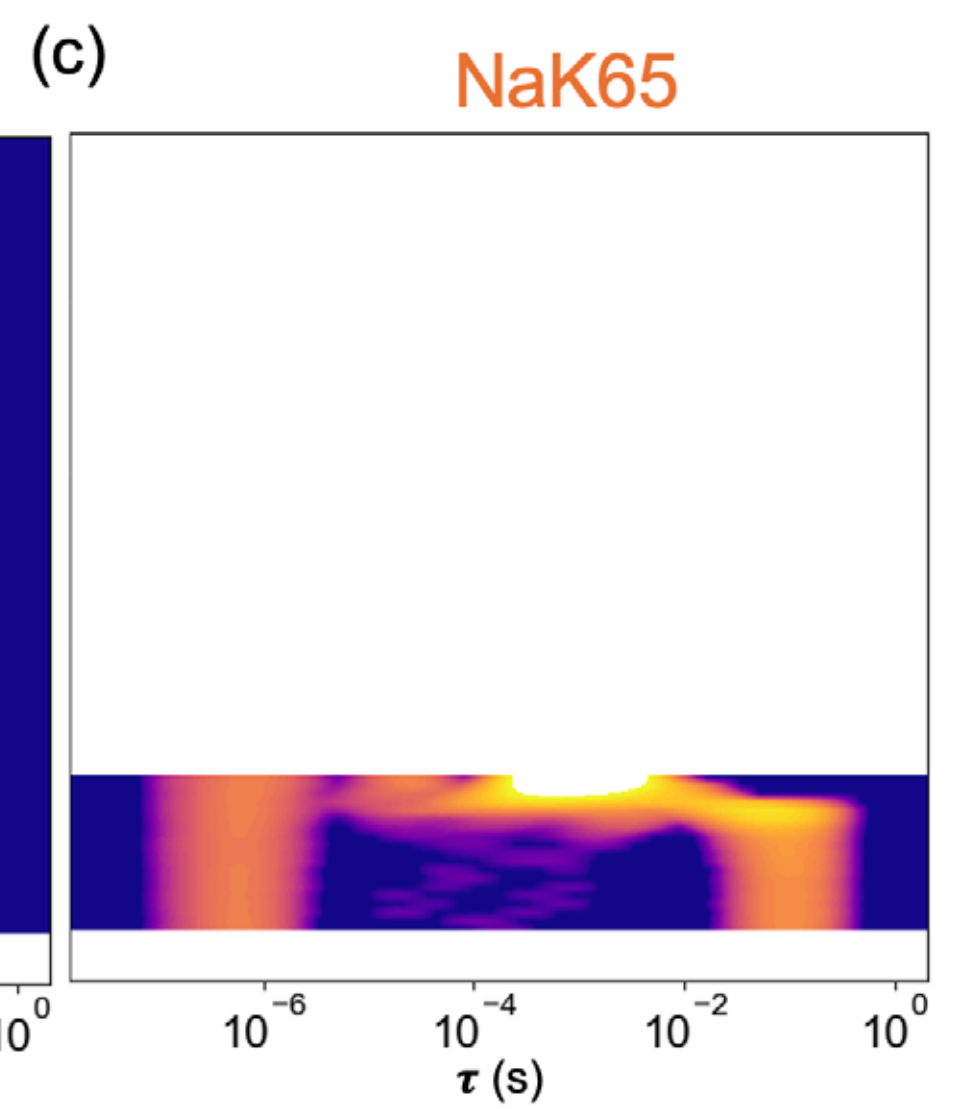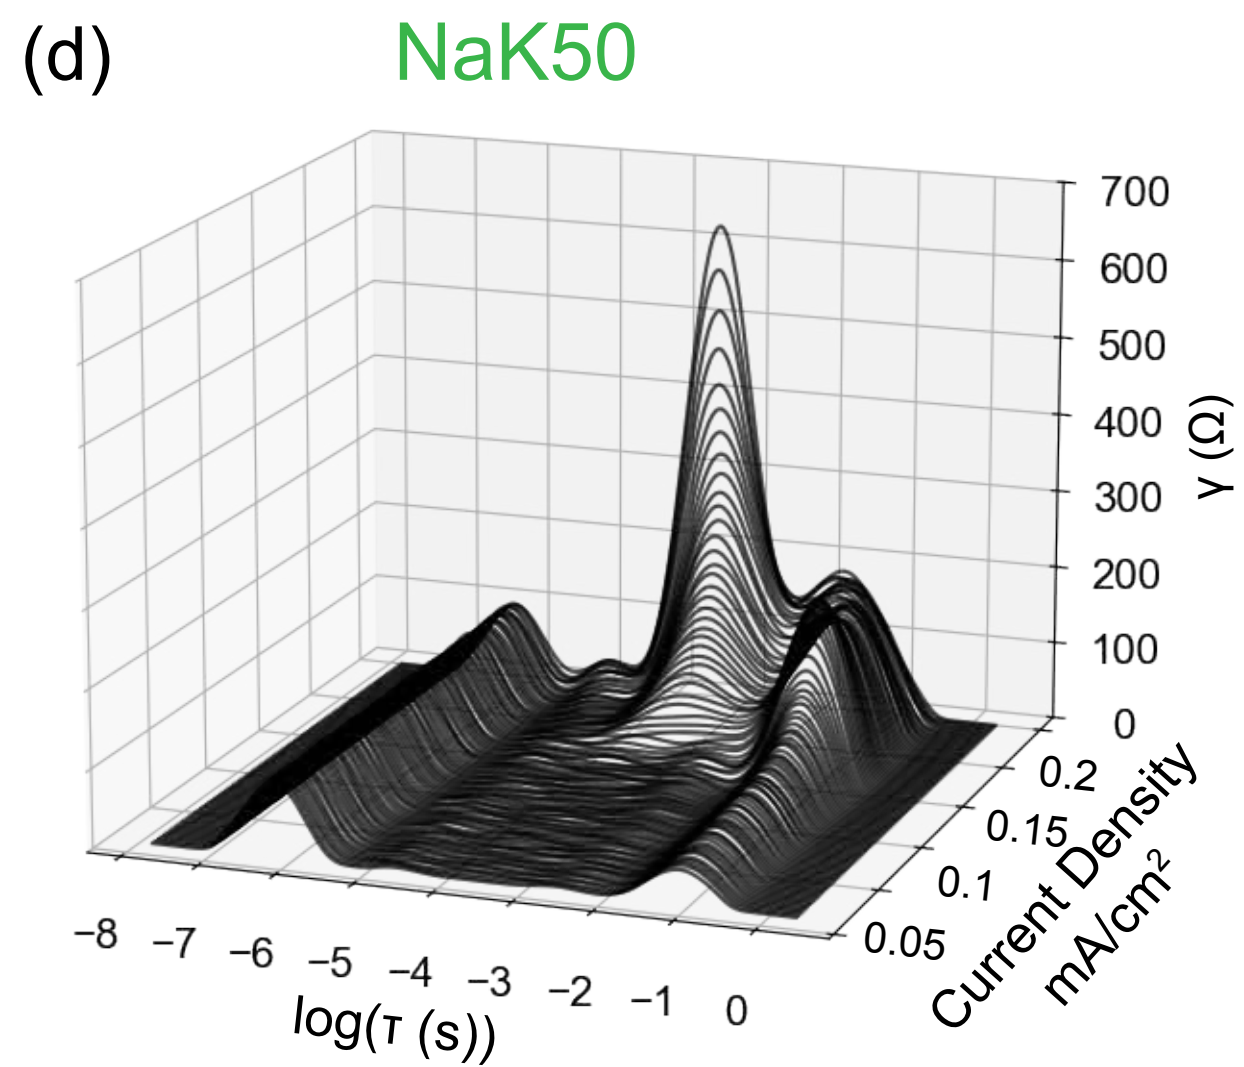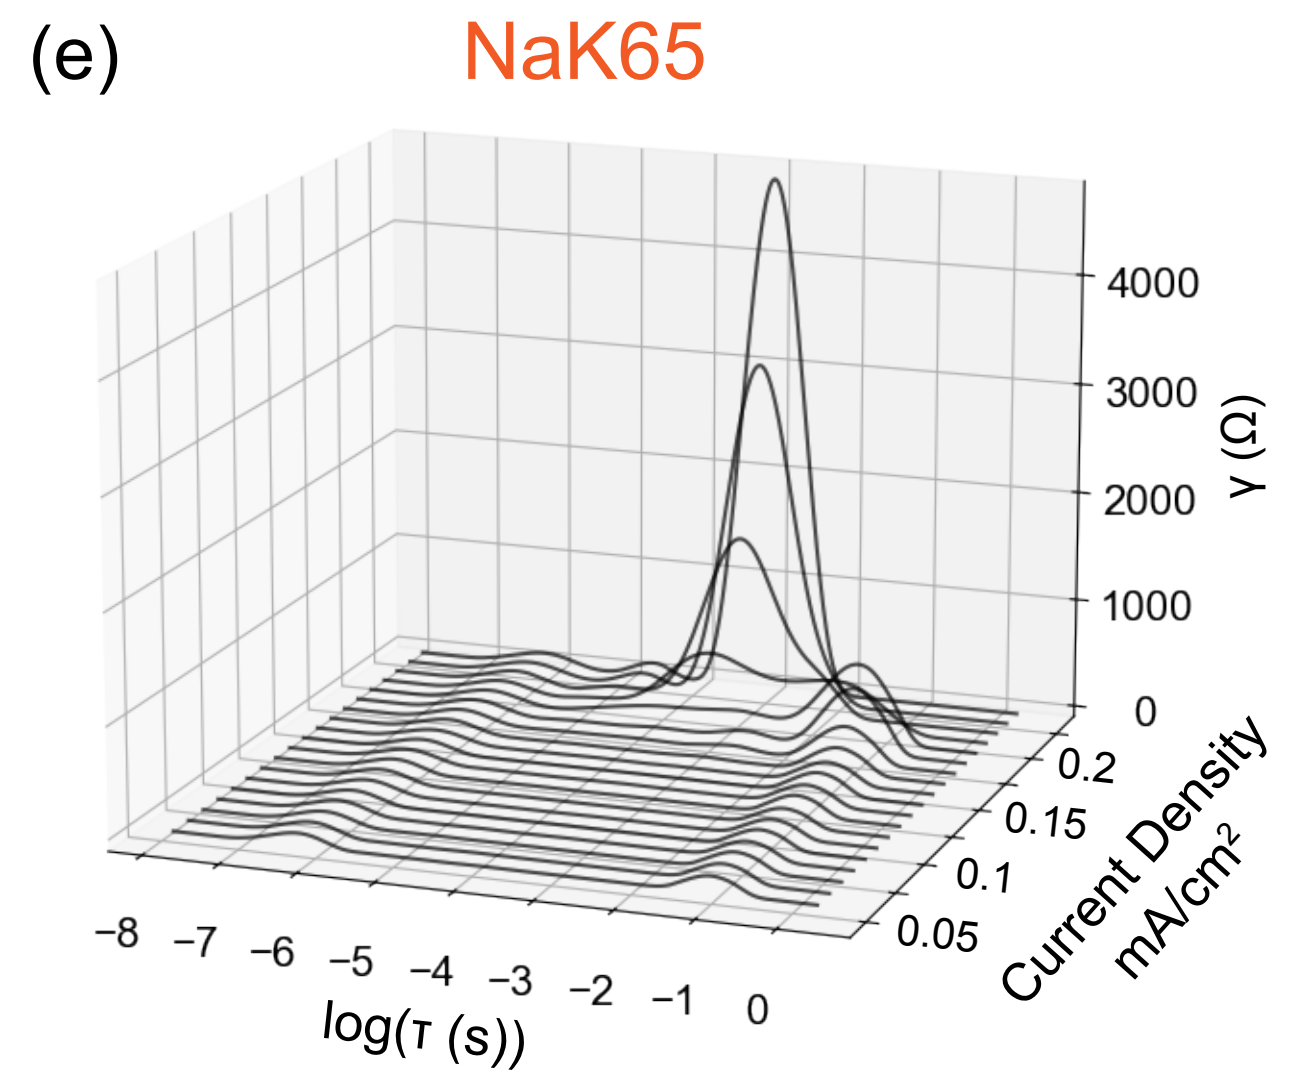

Supplement: d5eb00097a2.zip [file Figure S6.pdf › SI Figures/Figure S6.pdf]

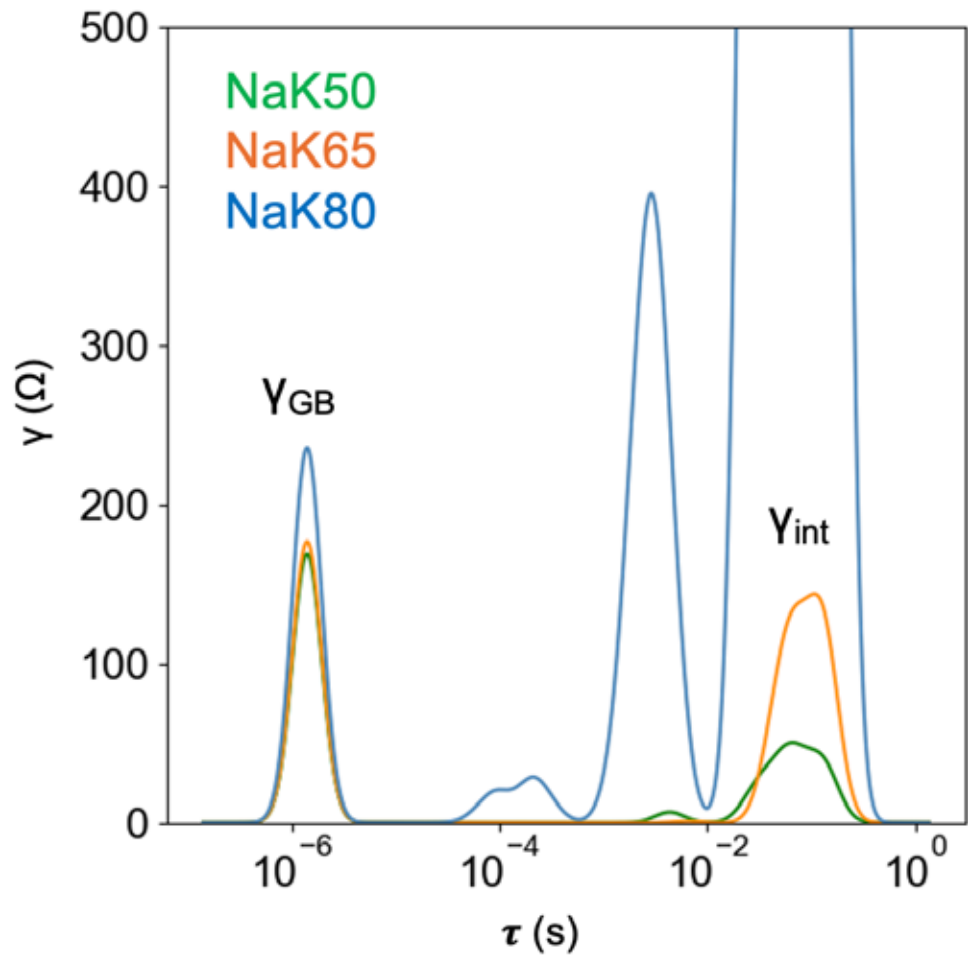

Supplement: d5eb00097a2.zip [file Figure S7.pdf › SI Figures/Figure S7.pdf]

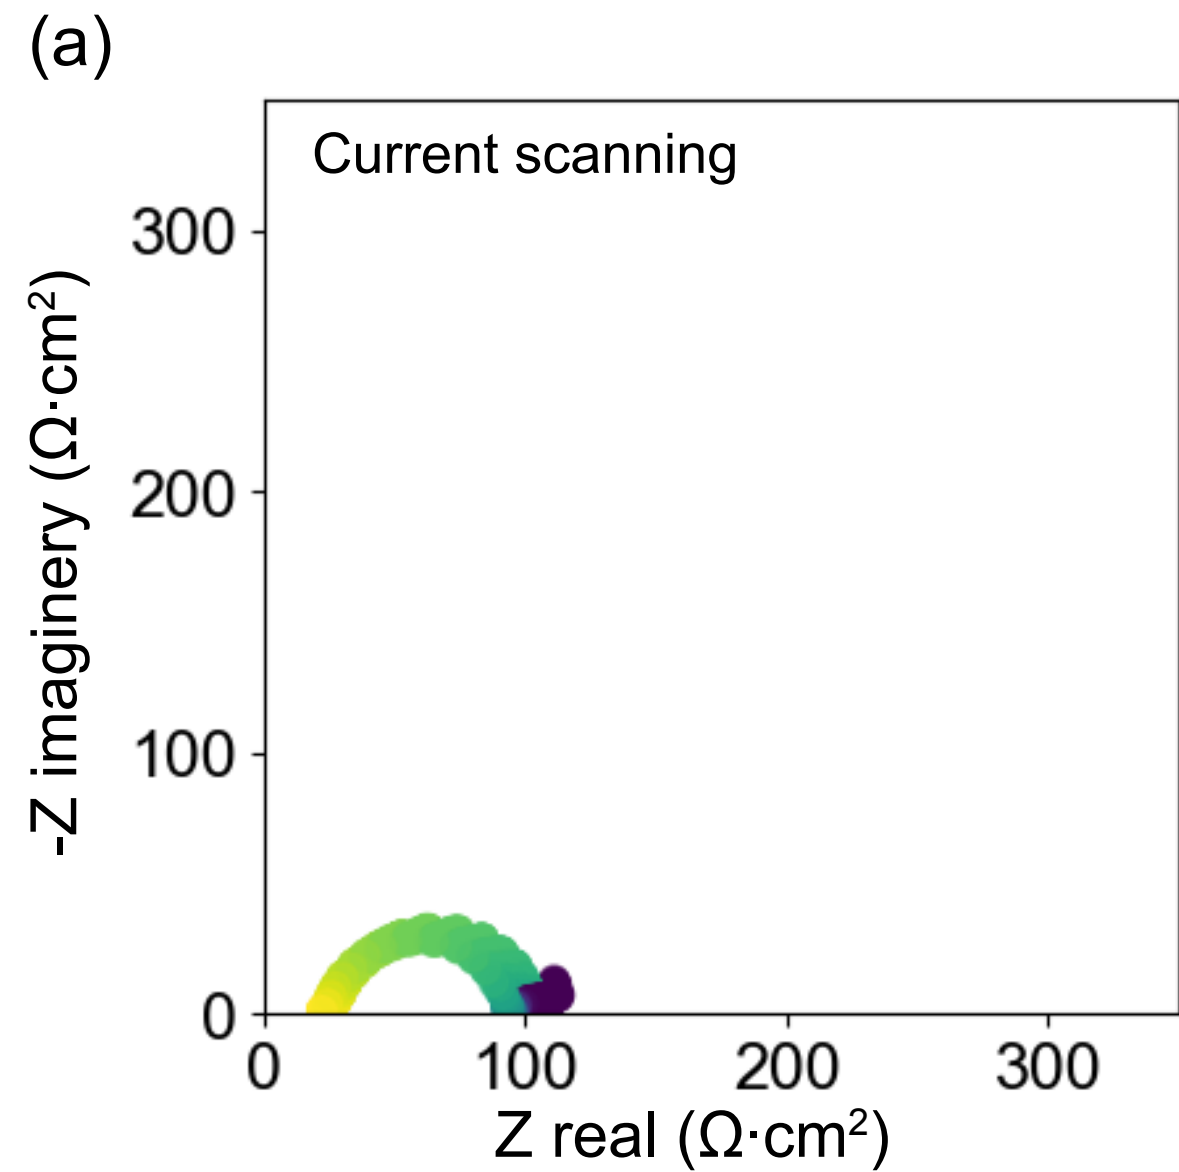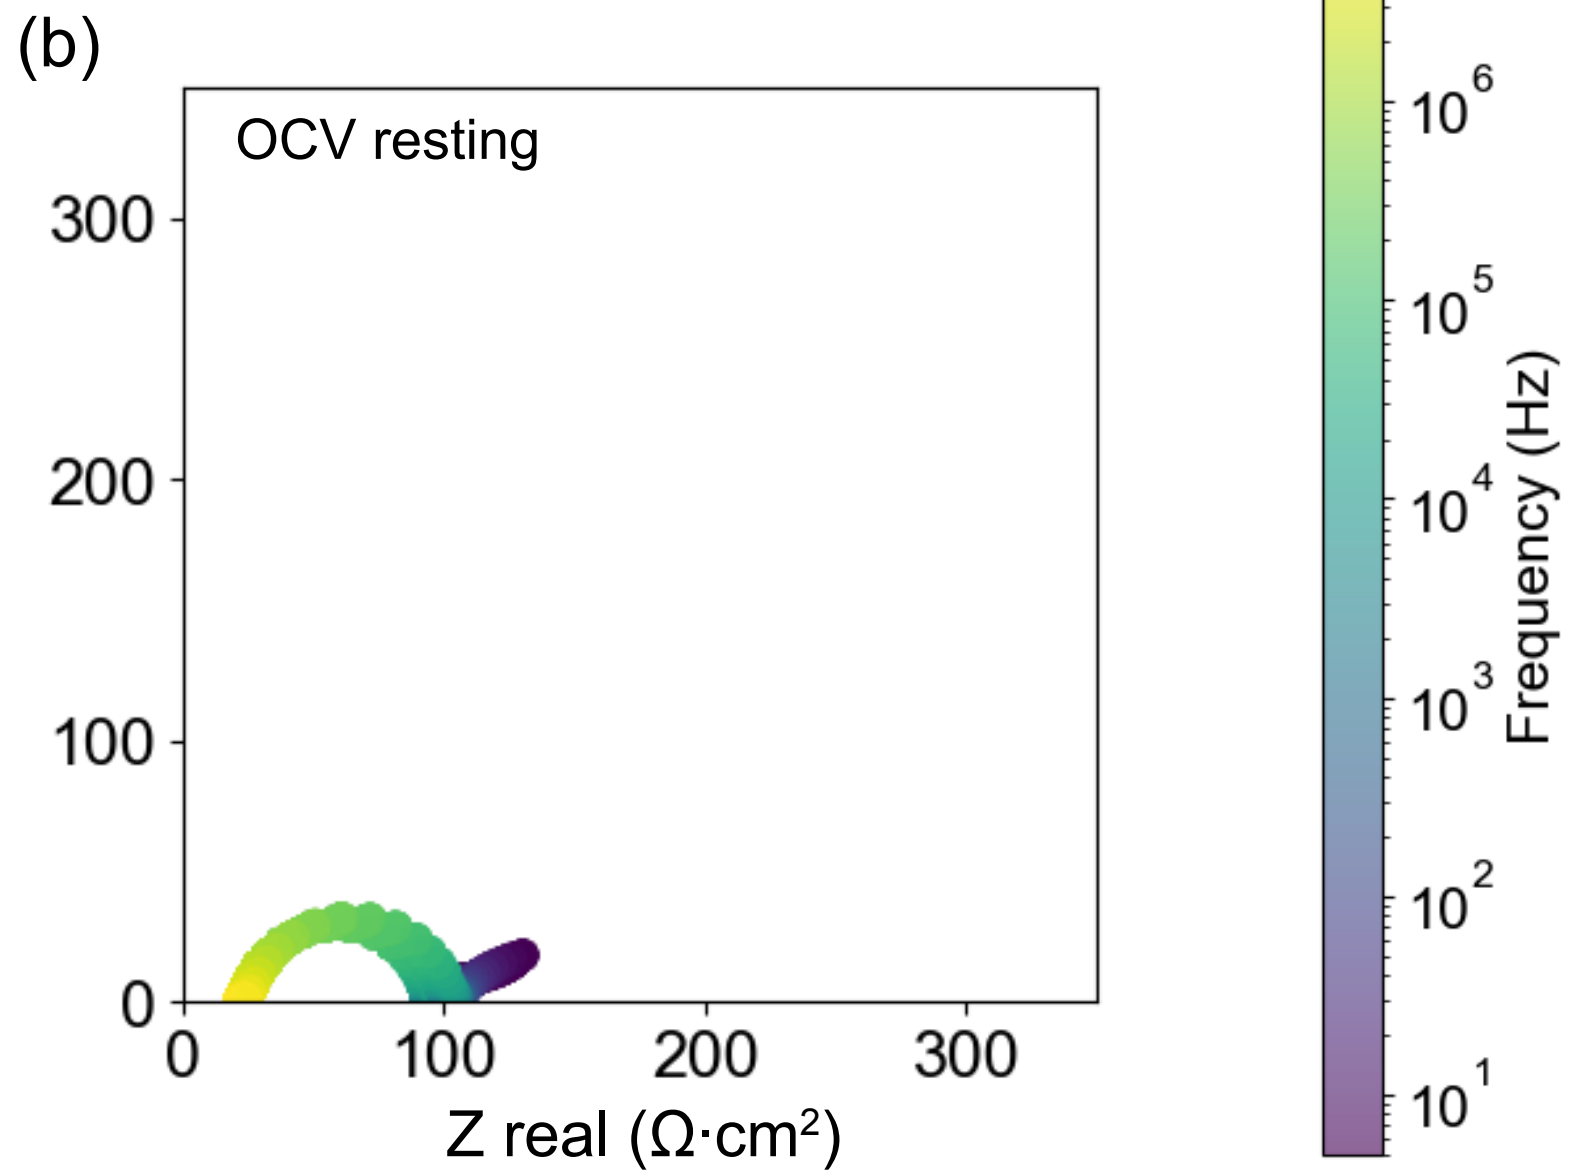

Supplement: d5eb00097a2.zip [file Figure S8.pdf › SI Figures/Figure S8.pdf]

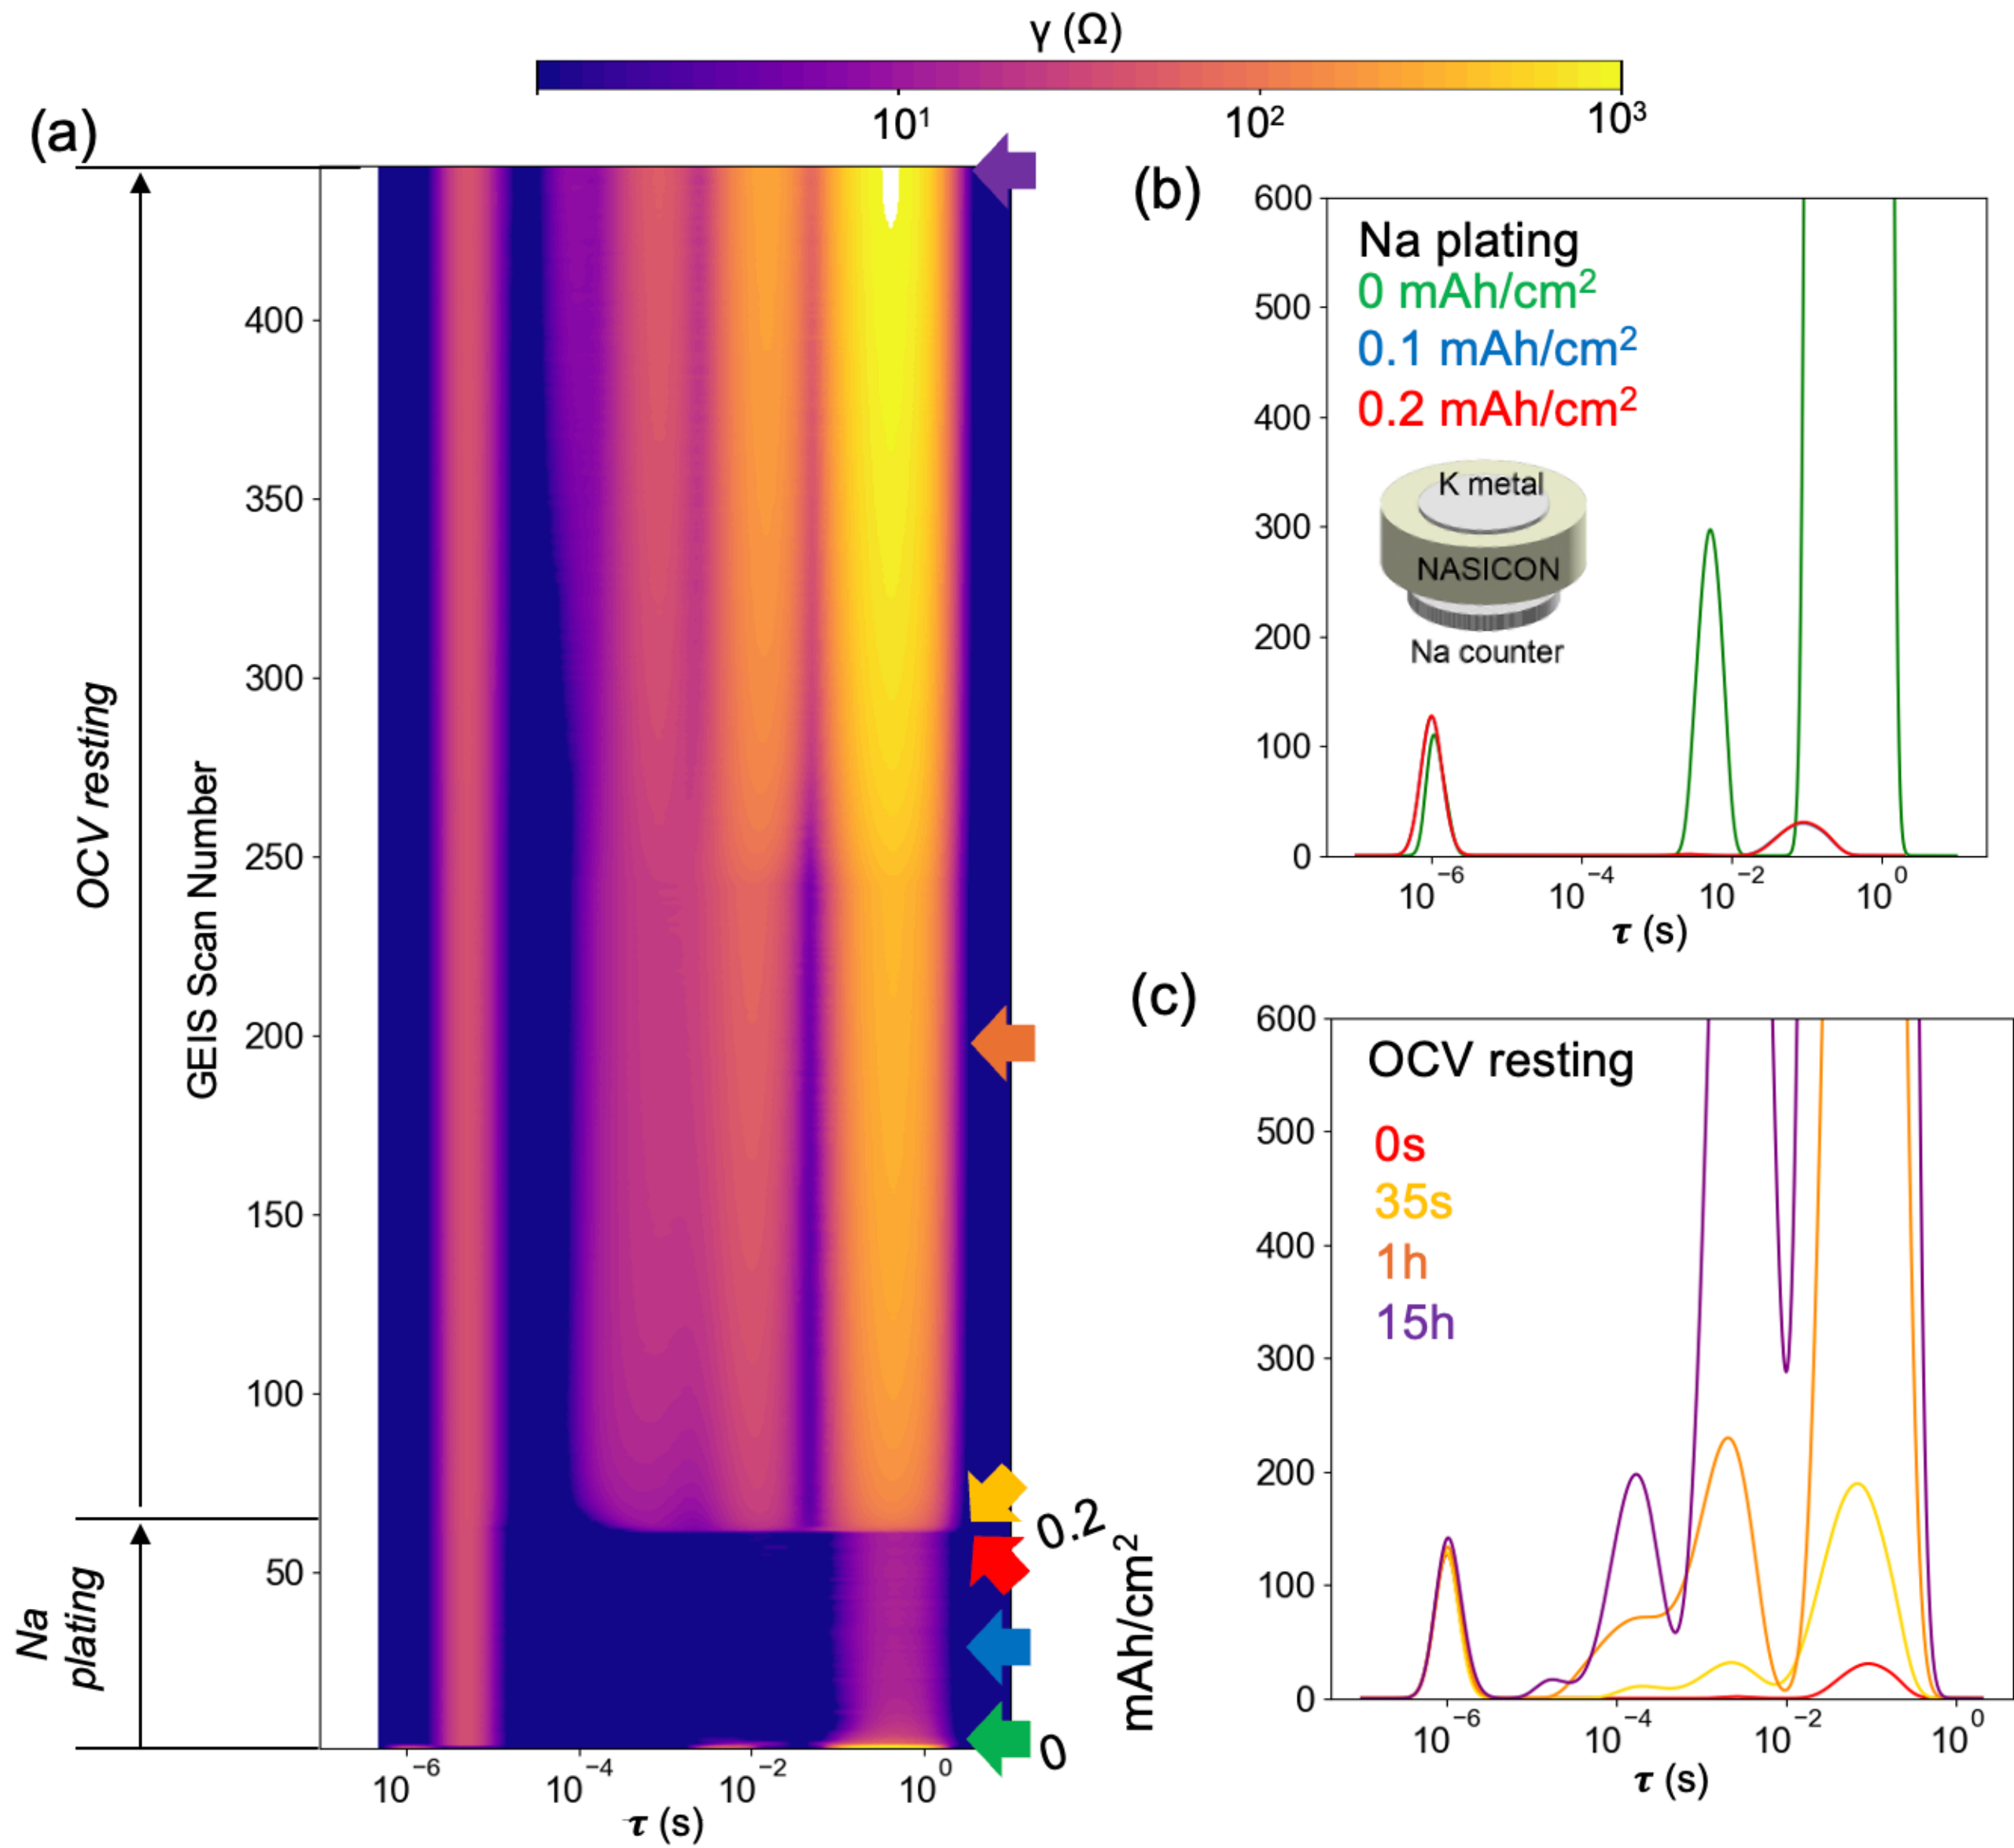

Supplement: d5eb00097a2.zip [file Figure S9.pdf › SI Figures/Figure S9.pdf]
